# Supplementary material for: Marine Compounds with Therapeutic Potential in Gram-Negative Sepsis
Source: MDPI journal article supplement (doi:10.3390/md11062216), 2013-06-19
Supplement: s1 [file s1]

marinedrugs-11-02216-s001.mol
  corina  04151402363D 1   1.00000     0.00000 
CORINA 3.49 0023  12.04.2013
123124  0  0  0  0  0  0  0  0999 V2000
   -1.3018    0.6302    0.4028 C   0  0  0  0  0  0  0  0  0  0  0  0
    0.0006    1.4350    0.4534 C   0  0  0  0  0  0  0  0  0  0  0  0
    0.9641    0.7649    1.4378 C   0  0  0  0  0  0  0  0  0  0  0  0
    1.1941   -0.6860    1.0070 C   0  0  0  0  0  0  0  0  0  0  0  0
   -0.0598   -1.3692    0.9506 O   0  0  0  0  0  0  0  0  0  0  0  0
   -0.9843   -0.8155    0.0120 C   0  0  0  0  0  0  0  0  0  0  0  0
    3.1956   -3.3224   -2.5989 C   0  0  0  0  0  0  0  0  0  0  0  0
    3.8916   -3.2123   -3.9590 C   0  0  0  0  0  0  0  0  0  0  0  0
    2.9922   -2.4270   -4.9184 C   0  0  0  0  0  0  0  0  0  0  0  0
    2.6849   -1.0560   -4.3104 C   0  0  0  0  0  0  0  0  0  0  0  0
    2.0668   -1.2302   -3.0338 O   0  0  0  0  0  0  0  0  0  0  0  0
    2.8804   -1.9168   -2.0805 C   0  0  0  0  0  0  0  0  0  0  0  0
    2.1313   -2.0196   -0.7504 C   0  0  0  0  0  0  0  0  0  0  0  0
    1.8075   -0.7085   -0.2835 O   0  0  0  0  0  0  0  0  0  0  0  0
   -2.2729   -1.6404    0.0178 C   0  0  0  0  0  0  0  0  0  0  0  0
   -1.9962   -2.9594   -0.4574 O   0  0  0  0  0  0  0  0  0  0  0  0
    1.9813   -4.0619   -2.7424 O   0  0  0  0  0  0  0  0  0  0  0  0
   -1.9264    0.6513    1.6879 O   0  0  0  0  0  0  0  0  0  0  0  0
    0.6020    1.4693   -0.8677 O   0  0  0  0  0  0  0  0  0  0  0  0
   -3.4026    1.2442    1.9358 P   0  0  0  0  0  0  0  0  0  0  0  0
   -3.7305    1.2263    3.5119 O   0  0  0  0  0  0  0  0  0  0  0  0
   -0.6446    3.2315   -1.3413 O   0  0  0  0  0  0  0  0  0  0  0  0
   -3.4661    2.6353    1.4345 O   0  0  0  0  0  0  0  0  0  0  0  0
    0.1487    2.4023   -1.7196 C   0  0  0  0  0  0  0  0  0  0  0  0
    0.6291    2.4156   -3.1479 C   0  0  0  0  0  0  0  0  0  0  0  0
    0.0232    3.6156   -3.8786 C   0  0  0  0  0  0  0  0  0  0  0  0
    0.6068    3.7009   -5.2903 C   0  0  0  0  0  0  0  0  0  0  0  0
   -4.4818    0.3418    1.1528 O   0  0  0  0  0  0  0  0  0  0  0  0
    0.0969    4.9694   -5.9772 C   0  0  0  0  0  0  0  0  0  0  0  0
    0.1706    6.3233   -8.0758 C   0  0  0  0  0  0  0  0  0  0  0  0
    0.6806    5.0548   -7.3889 C   0  0  0  0  0  0  0  0  0  0  0  0
    0.2444    7.6771  -10.1744 C   0  0  0  0  0  0  0  0  0  0  0  0
    0.7543    6.4087   -9.4875 C   0  0  0  0  0  0  0  0  0  0  0  0
    0.3181    9.0310  -12.2729 C   0  0  0  0  0  0  0  0  0  0  0  0
    0.8281    7.7625  -11.5861 C   0  0  0  0  0  0  0  0  0  0  0  0
    0.3919   10.3849  -14.3715 C   0  0  0  0  0  0  0  0  0  0  0  0
    0.9018    9.1164  -13.6846 C   0  0  0  0  0  0  0  0  0  0  0  0
   -1.4178    3.4558   -3.9595 O   0  0  0  0  0  0  0  0  0  0  0  0
    0.9756   10.4702  -15.7832 C   0  0  0  0  0  0  0  0  0  0  0  0
   -2.1552    4.5773   -3.9764 C   0  0  0  0  0  0  0  0  0  0  0  0
   -1.6146    5.6566   -3.9254 O   0  0  0  0  0  0  0  0  0  0  0  0
   -4.2507    5.9003   -4.0625 C   0  0  0  0  0  0  0  0  0  0  0  0
   -3.6574    4.4901   -4.0591 C   0  0  0  0  0  0  0  0  0  0  0  0
   -6.3691    7.2221   -4.1497 C   0  0  0  0  0  0  0  0  0  0  0  0
   -5.7758    5.8118   -4.1464 C   0  0  0  0  0  0  0  0  0  0  0  0
   -8.4876    8.5439   -4.2370 C   0  0  0  0  0  0  0  0  0  0  0  0
   -7.8943    7.1336   -4.2337 C   0  0  0  0  0  0  0  0  0  0  0  0
  -10.6060    9.8656   -4.3243 C   0  0  0  0  0  0  0  0  0  0  0  0
  -10.0127    8.4553   -4.3210 C   0  0  0  0  0  0  0  0  0  0  0  0
  -12.7244   11.1874   -4.4115 C   0  0  0  0  0  0  0  0  0  0  0  0
  -12.1311    9.7771   -4.4082 C   0  0  0  0  0  0  0  0  0  0  0  0
  -14.8429   12.5091   -4.4988 C   0  0  0  0  0  0  0  0  0  0  0  0
  -14.2496   11.0988   -4.4955 C   0  0  0  0  0  0  0  0  0  0  0  0
  -16.3680   12.4206   -4.5828 C   0  0  0  0  0  0  0  0  0  0  0  0
    2.2408    1.4834    1.4391 N   0  0  0  0  0  0  0  0  0  0  0  0
    3.0449    1.4267    2.5192 C   0  0  0  0  0  0  0  0  0  0  0  0
    4.3582    2.1658    2.5206 C   0  0  0  0  0  0  0  0  0  0  0  0
    4.9758    2.1056    3.9191 C   0  0  0  0  0  0  0  0  0  0  0  0
    4.0786    2.8557    4.9056 C   0  0  0  0  0  0  0  0  0  0  0  0
    4.7497    2.8910    6.2801 C   0  0  0  0  0  0  0  0  0  0  0  0
    3.8524    3.6412    7.2666 C   0  0  0  0  0  0  0  0  0  0  0  0
    4.5235    3.6764    8.6411 C   0  0  0  0  0  0  0  0  0  0  0  0
    3.6263    4.4266    9.6276 C   0  0  0  0  0  0  0  0  0  0  0  0
    4.2974    4.4618   11.0021 C   0  0  0  0  0  0  0  0  0  0  0  0
    3.4001    5.2120   11.9886 C   0  0  0  0  0  0  0  0  0  0  0  0
    4.0712    5.2473   13.3631 C   0  0  0  0  0  0  0  0  0  0  0  0
    3.1740    5.9974   14.3496 C   0  0  0  0  0  0  0  0  0  0  0  0
    3.8451    6.0327   15.7242 C   0  0  0  0  0  0  0  0  0  0  0  0
    2.9478    6.7828   16.7107 C   0  0  0  0  0  0  0  0  0  0  0  0
    2.7116    0.7807    3.4901 O   0  0  0  0  0  0  0  0  0  0  0  0
    5.0992    0.7198    4.3345 O   0  0  0  0  0  0  0  0  0  0  0  0
    6.3031    0.1446    4.1879 C   0  0  0  0  0  0  0  0  0  0  0  0
    7.9574   -1.6974    4.3282 C   0  0  0  0  0  0  0  0  0  0  0  0
    6.5071   -1.2912    4.5978 C   0  0  0  0  0  0  0  0  0  0  0  0
    8.1645   -3.1551    4.7443 C   0  0  0  0  0  0  0  0  0  0  0  0
    9.6148   -3.5613    4.4746 C   0  0  0  0  0  0  0  0  0  0  0  0
    9.8219   -5.0190    4.8908 C   0  0  0  0  0  0  0  0  0  0  0  0
   11.2721   -5.4252    4.6211 C   0  0  0  0  0  0  0  0  0  0  0  0
   11.4793   -6.8829    5.0372 C   0  0  0  0  0  0  0  0  0  0  0  0
   12.9295   -7.2890    4.7676 C   0  0  0  0  0  0  0  0  0  0  0  0
   13.1366   -8.7467    5.1837 C   0  0  0  0  0  0  0  0  0  0  0  0
   14.5869   -9.1529    4.9141 C   0  0  0  0  0  0  0  0  0  0  0  0
   14.7940  -10.6106    5.3302 C   0  0  0  0  0  0  0  0  0  0  0  0
    7.2233    0.7780    3.7274 O   0  0  0  0  0  0  0  0  0  0  0  0
    5.1574   -2.5184   -3.8021 O   0  0  0  0  0  0  0  0  0  0  0  0
    6.2370   -3.2718   -3.5401 C   0  0  0  0  0  0  0  0  0  0  0  0
    8.6360   -3.6957   -3.0771 C   0  0  0  0  0  0  0  0  0  0  0  0
    7.5851   -2.6215   -3.3646 C   0  0  0  0  0  0  0  0  0  0  0  0
   11.0850   -4.1398   -2.8595 C   0  0  0  0  0  0  0  0  0  0  0  0
   10.0225   -3.0510   -3.0225 C   0  0  0  0  0  0  0  0  0  0  0  0
   13.5341   -4.5839   -2.6418 C   0  0  0  0  0  0  0  0  0  0  0  0
   12.4715   -3.4951   -2.8048 C   0  0  0  0  0  0  0  0  0  0  0  0
   15.9831   -5.0280   -2.4242 C   0  0  0  0  0  0  0  0  0  0  0  0
   14.9206   -3.9392   -2.5872 C   0  0  0  0  0  0  0  0  0  0  0  0
   18.4321   -5.4721   -2.2066 C   0  0  0  0  0  0  0  0  0  0  0  0
   17.3696   -4.3833   -2.3696 C   0  0  0  0  0  0  0  0  0  0  0  0
   20.8812   -5.9162   -1.9889 C   0  0  0  0  0  0  0  0  0  0  0  0
   19.8186   -4.8274   -2.1519 C   0  0  0  0  0  0  0  0  0  0  0  0
    6.1280   -4.4714   -3.4451 O   0  0  0  0  0  0  0  0  0  0  0  0
    8.3503   -4.3180   -1.8229 O   0  0  0  0  0  0  0  0  0  0  0  0
   22.2677   -5.2715   -1.9343 C   0  0  0  0  0  0  0  0  0  0  0  0
    3.6794   -2.2511   -6.2002 N   0  0  0  0  0  0  0  0  0  0  0  0
    2.9652   -2.0561   -7.3265 C   0  0  0  0  0  0  0  0  0  0  0  0
    3.6721   -1.8752   -8.6451 C   0  0  0  0  0  0  0  0  0  0  0  0
    2.6381   -1.6730   -9.7545 C   0  0  0  0  0  0  0  0  0  0  0  0
    3.3555   -1.3656  -11.0705 C   0  0  0  0  0  0  0  0  0  0  0  0
    2.3221   -1.0409  -12.1510 C   0  0  0  0  0  0  0  0  0  0  0  0
    3.0395   -0.7335  -13.4669 C   0  0  0  0  0  0  0  0  0  0  0  0
    2.0061   -0.4088  -14.5474 C   0  0  0  0  0  0  0  0  0  0  0  0
    2.7235   -0.1014  -15.8634 C   0  0  0  0  0  0  0  0  0  0  0  0
    1.6901    0.2234  -16.9439 C   0  0  0  0  0  0  0  0  0  0  0  0
    2.4075    0.5308  -18.2598 C   0  0  0  0  0  0  0  0  0  0  0  0
    1.3741    0.8555  -19.3403 C   0  0  0  0  0  0  0  0  0  0  0  0
    2.0915    1.1629  -20.6563 C   0  0  0  0  0  0  0  0  0  0  0  0
    1.0581    1.4876  -21.7368 C   0  0  0  0  0  0  0  0  0  0  0  0
    1.7755    1.7950  -23.0527 C   0  0  0  0  0  0  0  0  0  0  0  0
    1.7537   -2.0262   -7.2788 O   0  0  0  0  0  0  0  0  0  0  0  0
    1.8598   -2.8622   -9.9028 O   0  0  0  0  0  0  0  0  0  0  0  0
    3.9001   -0.3203   -4.1551 O   0  0  0  0  0  0  0  0  0  0  0  0
    3.9400    1.2792   -3.9760 P   0  0  0  0  0  0  0  0  0  0  0  0
    3.1807    1.9768   -5.2125 O   0  0  0  0  0  0  0  0  0  0  0  0
    3.2676    1.6510   -2.7111 O   0  0  0  0  0  0  0  0  0  0  0  0
    5.4707    1.7768   -3.9365 O   0  0  0  0  0  0  0  0  0  0  0  0
  4  5  1  0      
  5  6  1  0      
  6  1  1  0      
 10 11  1  0      
 11 12  1  0      
 12  7  1  0      
 12 13  1  0      
 13 14  1  0      
  4 14  1  0      
  6 15  1  0      
 15 16  1  0      
  4  3  1  0      
  3  2  1  0      
  1  2  1  0      
  7  8  1  0      
 10  9  1  0      
  8  9  1  0      
  7 17  1  0      
  1 18  1  0      
  2 19  1  0      
 18 20  1  0      
 20 21  1  0      
 20 23  2  0      
 19 24  1  0      
 24 25  1  0      
 25 26  1  0      
 26 27  1  0      
 24 22  2  0      
 20 28  1  0      
 29 27  1  0      
 30 31  1  0      
 31 29  1  0      
 32 33  1  0      
 33 30  1  0      
 34 35  1  0      
 35 32  1  0      
 36 37  1  0      
 37 34  1  0      
 26 38  1  0      
 36 39  1  0      
 38 40  1  0      
 40 41  2  0      
 42 43  1  0      
 43 40  1  0      
 44 45  1  0      
 45 42  1  0      
 46 47  1  0      
 47 44  1  0      
 48 49  1  0      
 49 46  1  0      
 50 51  1  0      
 51 48  1  0      
 52 53  1  0      
 53 50  1  0      
 52 54  1  0      
  3 55  1  0      
 55 56  1  0      
 56 57  1  0      
 57 58  1  0      
 58 59  1  0      
 59 60  1  0      
 60 61  1  0      
 61 62  1  0      
 62 63  1  0      
 63 64  1  0      
 64 65  1  0      
 65 66  1  0      
 66 67  1  0      
 67 68  1  0      
 68 69  1  0      
 56 70  2  0      
 58 71  1  0      
 71 72  1  0      
 73 74  1  0      
 74 72  1  0      
 73 75  1  0      
 75 76  1  0      
 76 77  1  0      
 77 78  1  0      
 78 79  1  0      
 79 80  1  0      
 80 81  1  0      
 81 82  1  0      
 82 83  1  0      
 72 84  2  0      
  8 85  1  0      
 85 86  1  0      
 87 88  1  0      
 88 86  1  0      
 89 90  1  0      
 90 87  1  0      
 91 92  1  0      
 92 89  1  0      
 93 94  1  0      
 94 91  1  0      
 95 96  1  0      
 96 93  1  0      
 97 98  1  0      
 98 95  1  0      
 86 99  2  0      
 87100  1  0      
 97101  1  0      
  9102  1  0      
102103  1  0      
103104  1  0      
104105  1  0      
105106  1  0      
106107  1  0      
107108  1  0      
108109  1  0      
109110  1  0      
110111  1  0      
111112  1  0      
112113  1  0      
113114  1  0      
114115  1  0      
115116  1  0      
103117  2  0      
105118  1  0      
 10119  1  0      
119120  1  0      
120121  1  0      
120122  2  0      
120123  1  0      
M  END
$$$$
