# Supplementary material for: Marine Compounds with Therapeutic Potential in Gram-Negative Sepsis
Source: MDPI journal article supplement (doi:10.3390/md11062216), 2013-06-19
Supplement: s2 [file s2]

marinedrugs-11-02216-s001.mol
  ChemDraw02071408482D

123124  0  0  0  0  0  0  0  0999 V2000
   -2.4597    5.8092    0.0000 C   0  0  0  0  0  0  0  0  0  0  0  0
   -2.0472    5.0948    0.0000 C   0  0  0  0  0  0  0  0  0  0  0  0
   -1.2491    5.3039    0.0000 C   0  0  0  0  0  0  0  0  0  0  0  0
   -0.4559    5.0948    0.0000 C   0  0  0  0  0  0  0  0  0  0  0  0
   -0.8683    5.8092    0.0000 O   0  0  0  0  0  0  0  0  0  0  0  0
   -1.6665    5.6002    0.0000 C   0  0  0  0  0  0  0  0  0  0  0  0
    1.6653    5.0667    0.0000 C   0  0  0  0  0  0  0  0  0  0  0  0
    2.0778    4.3523    0.0000 C   0  0  0  0  0  0  0  0  0  0  0  0
    2.8759    4.5614    0.0000 C   0  0  0  0  0  0  0  0  0  0  0  0
    3.6691    4.3523    0.0000 C   0  0  0  0  0  0  0  0  0  0  0  0
    3.2567    5.0667    0.0000 O   0  0  0  0  0  0  0  0  0  0  0  0
    2.4585    4.8577    0.0000 C   0  0  0  0  0  0  0  0  0  0  0  0
    2.2450    5.6546    0.0000 C   0  0  0  0  0  0  0  0  0  0  0  0
    1.4481    5.8681    0.0000 O   0  0  0  0  0  0  0  0  0  0  0  0
   -2.3810    6.0127    0.0000 C   0  0  0  0  0  0  0  0  0  0  0  0
   -2.3810    6.8377    0.0000 O   0  0  0  0  0  0  0  0  0  0  0  0
    0.9508    4.6542    0.0000 O   0  0  0  0  0  0  0  0  0  0  0  0
   -3.1742    5.3967    0.0000 O   0  0  0  0  0  0  0  0  0  0  0  0
   -2.8441    5.3083    0.0000 O   0  0  0  0  0  0  0  0  0  0  0  0
   -3.9992    5.3967    0.0000 P   0  0  0  0  0  0  0  0  0  0  0  0
   -4.8242    5.3967    0.0000 O   0  0  0  0  0  0  0  0  0  0  0  0
   -3.9992    4.5717    0.0000 O   0  0  0  0  0  0  0  0  0  0  0  0
   -3.9992    6.2217    0.0000 O   0  0  0  0  0  0  0  0  0  0  0  0
   -3.2842    4.5705    0.0000 C   0  0  0  0  0  0  0  0  0  0  0  0
   -2.8441    3.8793    0.0000 C   0  0  0  0  0  0  0  0  0  0  0  0
   -3.2566    3.1649    0.0000 C   0  0  0  0  0  0  0  0  0  0  0  0
   -2.8441    2.4504    0.0000 C   0  0  0  0  0  0  0  0  0  0  0  0
   -4.0009    5.0091    0.0000 O   0  0  0  0  0  0  0  0  0  0  0  0
   -3.2566    1.7359    0.0000 C   0  0  0  0  0  0  0  0  0  0  0  0
   -3.2566    0.3070    0.0000 C   0  0  0  0  0  0  0  0  0  0  0  0
   -2.8441    1.0215    0.0000 C   0  0  0  0  0  0  0  0  0  0  0  0
   -3.2566   -1.1220    0.0000 C   0  0  0  0  0  0  0  0  0  0  0  0
   -2.8441   -0.4075    0.0000 C   0  0  0  0  0  0  0  0  0  0  0  0
   -3.2566   -2.5509    0.0000 C   0  0  0  0  0  0  0  0  0  0  0  0
   -2.8441   -1.8364    0.0000 C   0  0  0  0  0  0  0  0  0  0  0  0
   -3.2566   -3.9798    0.0000 C   0  0  0  0  0  0  0  0  0  0  0  0
   -2.8441   -3.2654    0.0000 C   0  0  0  0  0  0  0  0  0  0  0  0
   -4.0816    3.1649    0.0000 O   0  0  0  0  0  0  0  0  0  0  0  0
   -2.8441   -4.6943    0.0000 C   0  0  0  0  0  0  0  0  0  0  0  0
   -4.4941    2.4504    0.0000 C   0  0  0  0  0  0  0  0  0  0  0  0
   -5.3191    2.4504    0.0000 O   0  0  0  0  0  0  0  0  0  0  0  0
   -4.4941    1.0215    0.0000 C   0  0  0  0  0  0  0  0  0  0  0  0
   -4.0816    1.7359    0.0000 C   0  0  0  0  0  0  0  0  0  0  0  0
   -4.4941   -0.4075    0.0000 C   0  0  0  0  0  0  0  0  0  0  0  0
   -4.0816    0.3070    0.0000 C   0  0  0  0  0  0  0  0  0  0  0  0
   -4.4941   -1.8364    0.0000 C   0  0  0  0  0  0  0  0  0  0  0  0
   -4.0816   -1.1220    0.0000 C   0  0  0  0  0  0  0  0  0  0  0  0
   -4.4941   -3.2654    0.0000 C   0  0  0  0  0  0  0  0  0  0  0  0
   -4.0816   -2.5509    0.0000 C   0  0  0  0  0  0  0  0  0  0  0  0
   -4.4941   -4.6943    0.0000 C   0  0  0  0  0  0  0  0  0  0  0  0
   -4.0816   -3.9798    0.0000 C   0  0  0  0  0  0  0  0  0  0  0  0
   -4.4941   -6.1232    0.0000 C   0  0  0  0  0  0  0  0  0  0  0  0
   -4.0816   -5.4088    0.0000 C   0  0  0  0  0  0  0  0  0  0  0  0
   -4.0816   -6.8377    0.0000 C   0  0  0  0  0  0  0  0  0  0  0  0
   -0.8366    4.5894    0.0000 N   0  0  0  0  0  0  0  0  0  0  0  0
   -1.2491    3.8749    0.0000 C   0  0  0  0  0  0  0  0  0  0  0  0
   -0.8366    3.1604    0.0000 C   0  0  0  0  0  0  0  0  0  0  0  0
   -1.2491    2.4460    0.0000 C   0  0  0  0  0  0  0  0  0  0  0  0
   -0.8366    1.7315    0.0000 C   0  0  0  0  0  0  0  0  0  0  0  0
   -1.2491    1.0170    0.0000 C   0  0  0  0  0  0  0  0  0  0  0  0
   -0.8366    0.3026    0.0000 C   0  0  0  0  0  0  0  0  0  0  0  0
   -1.2491   -0.4119    0.0000 C   0  0  0  0  0  0  0  0  0  0  0  0
   -0.8366   -1.1264    0.0000 C   0  0  0  0  0  0  0  0  0  0  0  0
   -1.2491   -1.8409    0.0000 C   0  0  0  0  0  0  0  0  0  0  0  0
   -0.8366   -2.5553    0.0000 C   0  0  0  0  0  0  0  0  0  0  0  0
   -1.2491   -3.2698    0.0000 C   0  0  0  0  0  0  0  0  0  0  0  0
   -0.8366   -3.9843    0.0000 C   0  0  0  0  0  0  0  0  0  0  0  0
   -1.2491   -4.6987    0.0000 C   0  0  0  0  0  0  0  0  0  0  0  0
   -0.8366   -5.4132    0.0000 C   0  0  0  0  0  0  0  0  0  0  0  0
   -2.0741    3.8749    0.0000 O   0  0  0  0  0  0  0  0  0  0  0  0
   -2.0741    2.4460    0.0000 O   0  0  0  0  0  0  0  0  0  0  0  0
   -2.4866    1.7315    0.0000 C   0  0  0  0  0  0  0  0  0  0  0  0
   -2.4866    0.3026    0.0000 C   0  0  0  0  0  0  0  0  0  0  0  0
   -2.0741    1.0170    0.0000 C   0  0  0  0  0  0  0  0  0  0  0  0
   -2.0741   -0.4119    0.0000 C   0  0  0  0  0  0  0  0  0  0  0  0
   -2.4866   -1.1264    0.0000 C   0  0  0  0  0  0  0  0  0  0  0  0
   -2.0741   -1.8409    0.0000 C   0  0  0  0  0  0  0  0  0  0  0  0
   -2.4866   -2.5553    0.0000 C   0  0  0  0  0  0  0  0  0  0  0  0
   -2.0741   -3.2698    0.0000 C   0  0  0  0  0  0  0  0  0  0  0  0
   -2.4866   -3.9843    0.0000 C   0  0  0  0  0  0  0  0  0  0  0  0
   -2.0741   -4.6987    0.0000 C   0  0  0  0  0  0  0  0  0  0  0  0
   -2.4866   -5.4132    0.0000 C   0  0  0  0  0  0  0  0  0  0  0  0
   -2.0741   -6.1277    0.0000 C   0  0  0  0  0  0  0  0  0  0  0  0
   -2.8872    1.7297    0.0000 O   0  0  0  0  0  0  0  0  0  0  0  0
    1.2809    4.5658    0.0000 O   0  0  0  0  0  0  0  0  0  0  0  0
    0.8684    3.8513    0.0000 C   0  0  0  0  0  0  0  0  0  0  0  0
    0.8684    2.4224    0.0000 C   0  0  0  0  0  0  0  0  0  0  0  0
    1.2809    3.1368    0.0000 C   0  0  0  0  0  0  0  0  0  0  0  0
    0.8684    0.9934    0.0000 C   0  0  0  0  0  0  0  0  0  0  0  0
    1.2809    1.7079    0.0000 C   0  0  0  0  0  0  0  0  0  0  0  0
    0.8684   -0.4355    0.0000 C   0  0  0  0  0  0  0  0  0  0  0  0
    1.2809    0.2790    0.0000 C   0  0  0  0  0  0  0  0  0  0  0  0
    0.8684   -1.8645    0.0000 C   0  0  0  0  0  0  0  0  0  0  0  0
    1.2809   -1.1500    0.0000 C   0  0  0  0  0  0  0  0  0  0  0  0
    0.8684   -3.2934    0.0000 C   0  0  0  0  0  0  0  0  0  0  0  0
    1.2809   -2.5789    0.0000 C   0  0  0  0  0  0  0  0  0  0  0  0
    0.8684   -4.7223    0.0000 C   0  0  0  0  0  0  0  0  0  0  0  0
    1.2809   -4.0079    0.0000 C   0  0  0  0  0  0  0  0  0  0  0  0
    0.0434    3.8513    0.0000 O   0  0  0  0  0  0  0  0  0  0  0  0
    0.0434    2.4224    0.0000 O   0  0  0  0  0  0  0  0  0  0  0  0
    1.2809   -5.4368    0.0000 C   0  0  0  0  0  0  0  0  0  0  0  0
    3.2884    3.8469    0.0000 N   0  0  0  0  0  0  0  0  0  0  0  0
    2.8759    3.1324    0.0000 C   0  0  0  0  0  0  0  0  0  0  0  0
    3.2884    2.4179    0.0000 C   0  0  0  0  0  0  0  0  0  0  0  0
    2.8759    1.7035    0.0000 C   0  0  0  0  0  0  0  0  0  0  0  0
    3.2884    0.9890    0.0000 C   0  0  0  0  0  0  0  0  0  0  0  0
    2.8759    0.2745    0.0000 C   0  0  0  0  0  0  0  0  0  0  0  0
    3.2884   -0.4399    0.0000 C   0  0  0  0  0  0  0  0  0  0  0  0
    2.8759   -1.1544    0.0000 C   0  0  0  0  0  0  0  0  0  0  0  0
    3.2884   -1.8689    0.0000 C   0  0  0  0  0  0  0  0  0  0  0  0
    2.8759   -2.5834    0.0000 C   0  0  0  0  0  0  0  0  0  0  0  0
    3.2884   -3.2978    0.0000 C   0  0  0  0  0  0  0  0  0  0  0  0
    2.8759   -4.0123    0.0000 C   0  0  0  0  0  0  0  0  0  0  0  0
    3.2884   -4.7268    0.0000 C   0  0  0  0  0  0  0  0  0  0  0  0
    2.8759   -5.4412    0.0000 C   0  0  0  0  0  0  0  0  0  0  0  0
    3.2884   -6.1557    0.0000 C   0  0  0  0  0  0  0  0  0  0  0  0
    2.0509    3.1324    0.0000 O   0  0  0  0  0  0  0  0  0  0  0  0
    2.0509    1.7035    0.0000 O   0  0  0  0  0  0  0  0  0  0  0  0
    3.6691    5.1773    0.0000 O   0  0  0  0  0  0  0  0  0  0  0  0
    4.4941    5.1773    0.0000 P   0  0  0  0  0  0  0  0  0  0  0  0
    5.3191    5.1773    0.0000 O   0  0  0  0  0  0  0  0  0  0  0  0
    4.4941    4.3523    0.0000 O   0  0  0  0  0  0  0  0  0  0  0  0
    4.4941    6.0023    0.0000 O   0  0  0  0  0  0  0  0  0  0  0  0
  4  5  1  0      
  5  6  1  0      
  6  1  1  0      
 10 11  1  0      
 11 12  1  0      
 12  7  1  0      
 12 13  1  0      
 13 14  1  0      
  4 14  1  0      
  6 15  1  0      
 15 16  1  0      
  4  3  1  1      
  3  2  1  1      
  1  2  1  1      
  7  8  1  1      
 10  9  1  1      
  8  9  1  1      
  7 17  1  0      
  1 18  1  0      
  2 19  1  0      
 18 20  1  0      
 20 21  1  0      
 20 23  2  0      
 19 24  1  0      
 24 25  1  0      
 25 26  1  0      
 26 27  1  0      
 24 22  2  0      
 20 28  1  0      
 29 27  1  0      
 30 31  1  0      
 31 29  1  0      
 32 33  1  0      
 33 30  1  0      
 34 35  1  0      
 35 32  1  0      
 36 37  1  0      
 37 34  1  0      
 26 38  1  1      
 36 39  1  0      
 38 40  1  0      
 40 41  2  0      
 42 43  1  0      
 43 40  1  0      
 44 45  1  0      
 45 42  1  0      
 46 47  1  0      
 47 44  1  0      
 48 49  1  0      
 49 46  1  0      
 50 51  1  0      
 51 48  1  0      
 52 53  1  0      
 53 50  1  0      
 52 54  1  0      
  3 55  1  0      
 55 56  1  0      
 56 57  1  0      
 57 58  1  0      
 58 59  1  0      
 59 60  1  0      
 60 61  1  0      
 61 62  1  0      
 62 63  1  0      
 63 64  1  0      
 64 65  1  0      
 65 66  1  0      
 66 67  1  0      
 67 68  1  0      
 68 69  1  0      
 56 70  2  0      
 58 71  1  1      
 71 72  1  0      
 73 74  1  0      
 74 72  1  0      
 73 75  1  0      
 75 76  1  0      
 76 77  1  0      
 77 78  1  0      
 78 79  1  0      
 79 80  1  0      
 80 81  1  0      
 81 82  1  0      
 82 83  1  0      
 72 84  2  0      
  8 85  1  0      
 85 86  1  0      
 87 88  1  0      
 88 86  1  0      
 89 90  1  0      
 90 87  1  0      
 91 92  1  0      
 92 89  1  0      
 93 94  1  0      
 94 91  1  0      
 95 96  1  0      
 96 93  1  0      
 97 98  1  0      
 98 95  1  0      
 86 99  2  0      
 87100  1  1      
 97101  1  0      
  9102  1  0      
102103  1  0      
103104  1  0      
104105  1  0      
105106  1  0      
106107  1  0      
107108  1  0      
108109  1  0      
109110  1  0      
110111  1  0      
111112  1  0      
112113  1  0      
113114  1  0      
114115  1  0      
115116  1  0      
103117  2  0      
105118  1  1      
 10119  1  0      
119120  1  0      
120121  1  0      
120122  2  0      
120123  1  0      
M  END
