# Supplementary material for: Marine Compounds with Therapeutic Potential in Gram-Negative Sepsis
Source: MDPI journal article supplement (doi:10.3390/md11062216), 2013-06-19
Supplement: s3 [file s3]

marinedrugs-11-02216-s002.mol
  corina  04151402363D 1   1.00000     0.00000 
CORINA 3.49 0023  12.04.2013
 44 44  0  0  0  0  0  0  0  0999 V2000
    0.2699    1.0887    0.3130 C   0  0  0  0  0  0  0  0  0  0  0  0
    1.4212    2.0492   -0.0005 C   0  0  0  0  0  0  0  0  0  0  0  0
    2.4261    2.0186    1.1552 C   0  0  0  0  0  0  0  0  0  0  0  0
    2.9092    0.5809    1.3632 C   0  0  0  0  0  0  0  0  0  0  0  0
    1.7864   -0.2650    1.6199 O   0  0  0  0  0  0  0  0  0  0  0  0
    0.8362   -0.3131    0.5536 C   0  0  0  0  0  0  0  0  0  0  0  0
   -0.4176    1.5334    1.4842 O   0  0  0  0  0  0  0  0  0  0  0  0
    2.0847    1.6314   -1.2380 N   0  0  0  0  0  0  0  0  0  0  0  0
    2.4769    2.5555   -2.1374 C   0  0  0  0  0  0  0  0  0  0  0  0
    3.4980    3.3598   -4.2491 C   0  0  0  0  0  0  0  0  0  0  0  0
    3.1595    2.1258   -3.4104 C   0  0  0  0  0  0  0  0  0  0  0  0
    4.7456    4.1783   -6.2531 C   0  0  0  0  0  0  0  0  0  0  0  0
    4.3005    2.9349   -5.4806 C   0  0  0  0  0  0  0  0  0  0  0  0
    5.9931    4.9968   -8.2571 C   0  0  0  0  0  0  0  0  0  0  0  0
    5.5480    3.7535   -7.4846 C   0  0  0  0  0  0  0  0  0  0  0  0
    7.2407    5.8154  -10.2611 C   0  0  0  0  0  0  0  0  0  0  0  0
    6.7956    4.5720   -9.4886 C   0  0  0  0  0  0  0  0  0  0  0  0
    8.4883    6.6339  -12.2651 C   0  0  0  0  0  0  0  0  0  0  0  0
    8.0432    5.3905  -11.4926 C   0  0  0  0  0  0  0  0  0  0  0  0
    9.7358    7.4524  -14.2691 C   0  0  0  0  0  0  0  0  0  0  0  0
    9.2907    6.2090  -13.4966 C   0  0  0  0  0  0  0  0  0  0  0  0
    2.2806    3.7328   -1.9222 O   0  0  0  0  0  0  0  0  0  0  0  0
    2.2896    3.9990   -4.6653 O   0  0  0  0  0  0  0  0  0  0  0  0
   10.5383    7.0276  -15.5006 C   0  0  0  0  0  0  0  0  0  0  0  0
    3.5686    2.8772    0.8333 N   0  0  0  0  0  0  0  0  0  0  0  0
    4.3127    3.4083    1.8237 C   0  0  0  0  0  0  0  0  0  0  0  0
    5.4879    4.2915    1.4926 C   0  0  0  0  0  0  0  0  0  0  0  0
    6.1557    4.7586    2.7875 C   0  0  0  0  0  0  0  0  0  0  0  0
    7.4203    5.5516    2.4519 C   0  0  0  0  0  0  0  0  0  0  0  0
    8.1546    5.9119    3.7450 C   0  0  0  0  0  0  0  0  0  0  0  0
    9.4192    6.7050    3.4093 C   0  0  0  0  0  0  0  0  0  0  0  0
   10.1535    7.0652    4.7024 C   0  0  0  0  0  0  0  0  0  0  0  0
   11.4181    7.8583    4.3668 C   0  0  0  0  0  0  0  0  0  0  0  0
   12.1524    8.2185    5.6599 C   0  0  0  0  0  0  0  0  0  0  0  0
   13.4170    9.0116    5.3242 C   0  0  0  0  0  0  0  0  0  0  0  0
   14.1512    9.3719    6.6173 C   0  0  0  0  0  0  0  0  0  0  0  0
   15.4159   10.1650    6.2817 C   0  0  0  0  0  0  0  0  0  0  0  0
   16.1501   10.5252    7.5747 C   0  0  0  0  0  0  0  0  0  0  0  0
   17.4147   11.3183    7.2391 C   0  0  0  0  0  0  0  0  0  0  0  0
    4.0363    3.1753    2.9814 O   0  0  0  0  0  0  0  0  0  0  0  0
    5.2512    5.5905    3.5167 O   0  0  0  0  0  0  0  0  0  0  0  0
   -0.3013   -1.2660    0.9264 C   0  0  0  0  0  0  0  0  0  0  0  0
    0.2089   -2.5961    1.0383 O   0  0  0  0  0  0  0  0  0  0  0  0
    3.5861    0.1308    0.1880 O   0  0  0  0  0  0  0  0  0  0  0  0
  4  5  1  0      
  5  6  1  0      
  6  1  1  0      
  1  2  1  0      
  4  3  1  0      
  2  3  1  0      
  1  7  1  0      
  2  8  1  0      
  8  9  1  0      
 10 11  1  0      
 11  9  1  0      
 12 13  1  0      
 13 10  1  0      
 14 15  1  0      
 15 12  1  0      
 16 17  1  0      
 17 14  1  0      
 18 19  1  0      
 19 16  1  0      
 20 21  1  0      
 21 18  1  0      
  9 22  2  0      
 10 23  1  0      
 20 24  1  0      
  3 25  1  0      
 25 26  1  0      
 26 27  1  0      
 27 28  1  0      
 28 29  1  0      
 29 30  1  0      
 30 31  1  0      
 31 32  1  0      
 32 33  1  0      
 33 34  1  0      
 34 35  1  0      
 35 36  1  0      
 36 37  1  0      
 37 38  1  0      
 38 39  1  0      
 26 40  2  0      
 28 41  1  0      
  6 42  1  0      
 42 43  1  0      
  4 44  1  4      
M  END
$$$$
