# Supplementary material for: Marine Compounds with Therapeutic Potential in Gram-Negative Sepsis
Source: MDPI journal article supplement (doi:10.3390/md11062216), 2013-06-19
Supplement: s4 [file s4]

marinedrugs-11-02216-s002.mol
  ChemDraw02071408482D

 44 44  0  0  0  0  0  0  0  0999 V2000
   -0.6035    5.2178    0.0000 C   0  0  0  0  0  0  0  0  0  0  0  0
   -0.1910    4.5033    0.0000 C   0  0  0  0  0  0  0  0  0  0  0  0
    0.6071    4.7124    0.0000 C   0  0  0  0  0  0  0  0  0  0  0  0
    1.4004    4.5033    0.0000 C   0  0  0  0  0  0  0  0  0  0  0  0
    0.9879    5.2178    0.0000 O   0  0  0  0  0  0  0  0  0  0  0  0
    0.1898    5.0088    0.0000 C   0  0  0  0  0  0  0  0  0  0  0  0
   -1.4004    5.4313    0.0000 O   0  0  0  0  0  0  0  0  0  0  0  0
   -0.9879    4.7169    0.0000 N   0  0  0  0  0  0  0  0  0  0  0  0
   -1.4004    4.0024    0.0000 C   0  0  0  0  0  0  0  0  0  0  0  0
   -1.4004    2.5734    0.0000 C   0  0  0  0  0  0  0  0  0  0  0  0
   -0.9879    3.2879    0.0000 C   0  0  0  0  0  0  0  0  0  0  0  0
   -1.4004    1.1445    0.0000 C   0  0  0  0  0  0  0  0  0  0  0  0
   -0.9879    1.8590    0.0000 C   0  0  0  0  0  0  0  0  0  0  0  0
   -1.4004   -0.2844    0.0000 C   0  0  0  0  0  0  0  0  0  0  0  0
   -0.9879    0.4300    0.0000 C   0  0  0  0  0  0  0  0  0  0  0  0
   -1.4004   -1.7134    0.0000 C   0  0  0  0  0  0  0  0  0  0  0  0
   -0.9879   -0.9989    0.0000 C   0  0  0  0  0  0  0  0  0  0  0  0
   -1.4004   -3.1423    0.0000 C   0  0  0  0  0  0  0  0  0  0  0  0
   -0.9879   -2.4279    0.0000 C   0  0  0  0  0  0  0  0  0  0  0  0
   -1.4004   -4.5713    0.0000 C   0  0  0  0  0  0  0  0  0  0  0  0
   -0.9879   -3.8568    0.0000 C   0  0  0  0  0  0  0  0  0  0  0  0
   -2.2254    4.0024    0.0000 O   0  0  0  0  0  0  0  0  0  0  0  0
   -2.2254    2.5734    0.0000 O   0  0  0  0  0  0  0  0  0  0  0  0
   -0.9879   -5.2857    0.0000 C   0  0  0  0  0  0  0  0  0  0  0  0
    1.0196    3.9979    0.0000 N   0  0  0  0  0  0  0  0  0  0  0  0
    0.6071    3.2835    0.0000 C   0  0  0  0  0  0  0  0  0  0  0  0
    1.0196    2.5690    0.0000 C   0  0  0  0  0  0  0  0  0  0  0  0
    0.6071    1.8545    0.0000 C   0  0  0  0  0  0  0  0  0  0  0  0
    1.0196    1.1401    0.0000 C   0  0  0  0  0  0  0  0  0  0  0  0
    0.6071    0.4256    0.0000 C   0  0  0  0  0  0  0  0  0  0  0  0
    1.0196   -0.2889    0.0000 C   0  0  0  0  0  0  0  0  0  0  0  0
    0.6071   -1.0033    0.0000 C   0  0  0  0  0  0  0  0  0  0  0  0
    1.0196   -1.7178    0.0000 C   0  0  0  0  0  0  0  0  0  0  0  0
    0.6071   -2.4323    0.0000 C   0  0  0  0  0  0  0  0  0  0  0  0
    1.0196   -3.1468    0.0000 C   0  0  0  0  0  0  0  0  0  0  0  0
    0.6071   -3.8612    0.0000 C   0  0  0  0  0  0  0  0  0  0  0  0
    1.0196   -4.5757    0.0000 C   0  0  0  0  0  0  0  0  0  0  0  0
    0.6071   -5.2902    0.0000 C   0  0  0  0  0  0  0  0  0  0  0  0
    1.0196   -6.0046    0.0000 C   0  0  0  0  0  0  0  0  0  0  0  0
   -0.2179    3.2835    0.0000 O   0  0  0  0  0  0  0  0  0  0  0  0
   -0.2179    1.8545    0.0000 O   0  0  0  0  0  0  0  0  0  0  0  0
   -0.3936    5.5921    0.0000 C   0  0  0  0  0  0  0  0  0  0  0  0
    0.3209    6.0046    0.0000 O   0  0  0  0  0  0  0  0  0  0  0  0
    2.2254    4.5033    0.0000 O   0  0  0  0  0  0  0  0  0  0  0  0
  4  5  1  0      
  5  6  1  0      
  6  1  1  0      
  1  2  1  1      
  4  3  1  1      
  2  3  1  1      
  1  7  1  0      
  2  8  1  0      
  8  9  1  0      
 10 11  1  0      
 11  9  1  0      
 12 13  1  0      
 13 10  1  0      
 14 15  1  0      
 15 12  1  0      
 16 17  1  0      
 17 14  1  0      
 18 19  1  0      
 19 16  1  0      
 20 21  1  0      
 21 18  1  0      
  9 22  2  0      
 10 23  1  1      
 20 24  1  0      
  3 25  1  0      
 25 26  1  0      
 26 27  1  0      
 27 28  1  0      
 28 29  1  0      
 29 30  1  0      
 30 31  1  0      
 31 32  1  0      
 32 33  1  0      
 33 34  1  0      
 34 35  1  0      
 35 36  1  0      
 36 37  1  0      
 37 38  1  0      
 38 39  1  0      
 26 40  2  0      
 28 41  1  1      
  6 42  1  0      
 42 43  1  0      
  4 44  1  4      
M  END
