# Supplementary material for: Marine Compounds with Therapeutic Potential in Gram-Negative Sepsis
Source: MDPI journal article supplement (doi:10.3390/md11062216), 2013-06-19
Supplement: s5 [file s5]

marinedrugs-11-02216-s003.mol
  corina  04151402363D 1   1.00000     0.00000 
CORINA 3.49 0023  12.04.2013
 74 75  0  0  0  0  0  0  0  0999 V2000
   -0.0187    1.5267    0.0104 C   0  0  0  0  0  0  0  0  0  0  0  0
    1.4212    2.0492   -0.0005 C   0  0  0  0  0  0  0  0  0  0  0  0
    2.1715    1.4713    1.2034 C   0  0  0  0  0  0  0  0  0  0  0  0
    2.1077   -0.0573    1.1489 C   0  0  0  0  0  0  0  0  0  0  0  0
    0.7413   -0.4753    1.1306 O   0  0  0  0  0  0  0  0  0  0  0  0
    0.0021   -0.0041    0.0020 C   0  0  0  0  0  0  0  0  0  0  0  0
    3.7865   -3.8376   -1.4664 C   0  0  0  0  0  0  0  0  0  0  0  0
    4.4490   -4.2161   -2.7946 C   0  0  0  0  0  0  0  0  0  0  0  0
    3.5733   -3.7194   -3.9491 C   0  0  0  0  0  0  0  0  0  0  0  0
    3.3696   -2.2084   -3.8113 C   0  0  0  0  0  0  0  0  0  0  0  0
    2.7785   -1.9226   -2.5420 O   0  0  0  0  0  0  0  0  0  0  0  0
    3.5745   -2.3220   -1.4245 C   0  0  0  0  0  0  0  0  0  0  0  0
    2.8587   -1.9426   -0.1266 C   0  0  0  0  0  0  0  0  0  0  0  0
    2.7635   -0.5198   -0.0335 O   0  0  0  0  0  0  0  0  0  0  0  0
   -1.4314   -0.5342    0.0735 C   0  0  0  0  0  0  0  0  0  0  0  0
   -1.4195   -1.9578   -0.0502 O   0  0  0  0  0  0  0  0  0  0  0  0
    2.5248   -4.4994   -1.3564 O   0  0  0  0  0  0  0  0  0  0  0  0
   -0.6854    1.9888    1.1869 O   0  0  0  0  0  0  0  0  0  0  0  0
   -2.0117    2.9005    1.1422 P   0  0  0  0  0  0  0  0  0  0  0  0
   -2.4111    3.3403    2.6386 O   0  0  0  0  0  0  0  0  0  0  0  0
   -1.7534    4.1074    0.3256 O   0  0  0  0  0  0  0  0  0  0  0  0
   -3.2194    2.0593    0.4897 O   0  0  0  0  0  0  0  0  0  0  0  0
    3.5704    1.9047    1.1625 N   0  0  0  0  0  0  0  0  0  0  0  0
    4.2911    1.9635    2.2998 C   0  0  0  0  0  0  0  0  0  0  0  0
    5.7301    2.4093    2.2577 C   0  0  0  0  0  0  0  0  0  0  0  0
    6.3126    2.3866    3.6723 C   0  0  0  0  0  0  0  0  0  0  0  0
    7.8051    2.7182    3.6146 C   0  0  0  0  0  0  0  0  0  0  0  0
    8.4140    2.5738    5.0108 C   0  0  0  0  0  0  0  0  0  0  0  0
    9.9065    2.9055    4.9531 C   0  0  0  0  0  0  0  0  0  0  0  0
   10.5154    2.7611    6.3493 C   0  0  0  0  0  0  0  0  0  0  0  0
   12.0079    3.0928    6.2916 C   0  0  0  0  0  0  0  0  0  0  0  0
   12.6168    2.9484    7.6878 C   0  0  0  0  0  0  0  0  0  0  0  0
   14.1093    3.2800    7.6301 C   0  0  0  0  0  0  0  0  0  0  0  0
   14.7181    3.1356    9.0262 C   0  0  0  0  0  0  0  0  0  0  0  0
   16.2106    3.4673    8.9685 C   0  0  0  0  0  0  0  0  0  0  0  0
    3.7817    1.6577    3.3571 O   0  0  0  0  0  0  0  0  0  0  0  0
    5.6403    3.3550    4.4799 O   0  0  0  0  0  0  0  0  0  0  0  0
    4.2333   -4.0101   -5.2243 N   0  0  0  0  0  0  0  0  0  0  0  0
    3.5009   -4.1374   -6.3485 C   0  0  0  0  0  0  0  0  0  0  0  0
    4.1798   -4.4364   -7.6603 C   0  0  0  0  0  0  0  0  0  0  0  0
    3.1292   -4.5296   -8.7687 C   0  0  0  0  0  0  0  0  0  0  0  0
    3.8266   -4.7090  -10.1186 C   0  0  0  0  0  0  0  0  0  0  0  0
    2.7850   -4.6772  -11.2389 C   0  0  0  0  0  0  0  0  0  0  0  0
    3.4824   -4.8566  -12.5889 C   0  0  0  0  0  0  0  0  0  0  0  0
    2.4409   -4.8248  -13.7092 C   0  0  0  0  0  0  0  0  0  0  0  0
    3.1383   -5.0042  -15.0591 C   0  0  0  0  0  0  0  0  0  0  0  0
    2.0967   -4.9724  -16.1794 C   0  0  0  0  0  0  0  0  0  0  0  0
    2.7941   -5.1518  -17.5294 C   0  0  0  0  0  0  0  0  0  0  0  0
    1.7526   -5.1200  -18.6497 C   0  0  0  0  0  0  0  0  0  0  0  0
    2.4500   -5.2994  -19.9996 C   0  0  0  0  0  0  0  0  0  0  0  0
    2.2955   -4.0112   -6.3045 O   0  0  0  0  0  0  0  0  0  0  0  0
    2.2605   -5.6658   -8.5179 O   0  0  0  0  0  0  0  0  0  0  0  0
    4.6323   -1.5464   -3.9089 O   0  0  0  0  0  0  0  0  0  0  0  0
    4.7982   -0.0566   -4.4963 P   0  0  0  0  0  0  0  0  0  0  0  0
    4.3942   -0.0461   -6.0547 O   0  0  0  0  0  0  0  0  0  0  0  0
    3.9152    0.8686   -3.7515 O   0  0  0  0  0  0  0  0  0  0  0  0
    6.3288    0.4163   -4.3355 O   0  0  0  0  0  0  0  0  0  0  0  0
    0.9945   -5.5729   -8.9541 C   0  0  0  0  0  0  0  0  0  0  0  0
   -1.3307   -6.3534   -9.3191 C   0  0  0  0  0  0  0  0  0  0  0  0
    0.0347   -6.7129   -8.7299 C   0  0  0  0  0  0  0  0  0  0  0  0
   -3.6706   -7.1513   -9.6808 C   0  0  0  0  0  0  0  0  0  0  0  0
   -2.3052   -7.5108   -9.0915 C   0  0  0  0  0  0  0  0  0  0  0  0
   -6.0105   -7.9492  -10.0424 C   0  0  0  0  0  0  0  0  0  0  0  0
   -4.6450   -8.3087   -9.4532 C   0  0  0  0  0  0  0  0  0  0  0  0
   -8.3503   -8.7471  -10.4041 C   0  0  0  0  0  0  0  0  0  0  0  0
   -6.9849   -9.1066   -9.8148 C   0  0  0  0  0  0  0  0  0  0  0  0
  -10.6902   -9.5450  -10.7657 C   0  0  0  0  0  0  0  0  0  0  0  0
   -9.3247   -9.9045  -10.1765 C   0  0  0  0  0  0  0  0  0  0  0  0
  -11.6646  -10.7024  -10.5381 C   0  0  0  0  0  0  0  0  0  0  0  0
    0.6244   -4.5752   -9.5264 O   0  0  0  0  0  0  0  0  0  0  0  0
    2.0684    1.6417   -1.2076 O   0  0  0  0  0  0  0  0  0  0  0  0
    1.9399    2.5637   -2.2666 R   0  0  0  0  0  0  0  0  0  0  0  0
    5.7388   -3.6063   -2.8763 O   0  0  0  0  0  0  0  0  0  0  0  0
    6.7815   -4.3976   -2.3520 R   0  0  0  0  0  0  0  0  0  0  0  0
  4  5  1  0      
  5  6  1  0      
  6  1  1  0      
 10 11  1  0      
 11 12  1  0      
 12  7  1  0      
 12 13  1  0      
 13 14  1  0      
  4 14  1  0      
  6 15  1  0      
 15 16  1  0      
  4  3  1  0      
  3  2  1  0      
  1  2  1  0      
  7  8  1  0      
 10  9  1  0      
  8  9  1  0      
  7 17  1  0      
  1 18  1  0      
 18 19  1  0      
 19 20  1  0      
 19 21  2  0      
 19 22  1  0      
  3 23  1  0      
 23 24  1  0      
 24 25  1  0      
 25 26  1  0      
 26 27  1  0      
 27 28  1  0      
 28 29  1  0      
 29 30  1  0      
 30 31  1  0      
 31 32  1  0      
 32 33  1  0      
 33 34  1  0      
 34 35  1  0      
 24 36  2  0      
 26 37  1  0      
  9 38  1  0      
 38 39  1  0      
 39 40  1  0      
 40 41  1  0      
 41 42  1  0      
 42 43  1  0      
 43 44  1  0      
 44 45  1  0      
 45 46  1  0      
 46 47  1  0      
 47 48  1  0      
 48 49  1  0      
 49 50  1  0      
 39 51  2  0      
 41 52  1  0      
 10 53  1  0      
 53 54  1  0      
 54 55  1  0      
 54 56  2  0      
 54 57  1  0      
 52 58  1  0      
 59 60  1  0      
 60 58  1  0      
 61 62  1  0      
 62 59  1  0      
 63 64  1  0      
 64 61  1  0      
 65 66  1  0      
 66 63  1  0      
 67 68  1  0      
 68 65  1  0      
 67 69  1  0      
 58 70  2  0      
  2 71  1  0      
 71 72  1  0      
  8 73  1  0      
 73 74  1  0      
M  STY  1   1 SUP
M  SLB  1   1   1
M  SAL   1  2  71  72
M  SBL   1  1  72
M  SMT   1 OR
M  SBV   1 72   -8.8142    8.3721
M  STY  1   2 SUP
M  SLB  1   2   2
M  SAL   2  2  73  74
M  SBL   2  1  74
M  SMT   2 OR
M  SBV   2 74   -8.8142    8.3721
M  END
$$$$
