# Supplementary material for: Marine Compounds with Therapeutic Potential in Gram-Negative Sepsis
Source: MDPI journal article supplement (doi:10.3390/md11062216), 2013-06-19
Supplement: s6 [file s6]

marinedrugs-11-02216-s003.mol
  ChemDraw02071408482D

 74 75  0  0  0  0  0  0  0  0999 V2000
   -2.7072    5.8255    0.0000 C   0  0  0  0  0  0  0  0  0  0  0  0
   -2.2947    5.1110    0.0000 C   0  0  0  0  0  0  0  0  0  0  0  0
   -1.4966    5.3201    0.0000 C   0  0  0  0  0  0  0  0  0  0  0  0
   -0.7034    5.1110    0.0000 C   0  0  0  0  0  0  0  0  0  0  0  0
   -1.1158    5.8255    0.0000 O   0  0  0  0  0  0  0  0  0  0  0  0
   -1.9139    5.6164    0.0000 C   0  0  0  0  0  0  0  0  0  0  0  0
    1.4178    5.0830    0.0000 C   0  0  0  0  0  0  0  0  0  0  0  0
    1.8303    4.3685    0.0000 C   0  0  0  0  0  0  0  0  0  0  0  0
    2.6284    4.5776    0.0000 C   0  0  0  0  0  0  0  0  0  0  0  0
    3.4216    4.3685    0.0000 C   0  0  0  0  0  0  0  0  0  0  0  0
    3.0092    5.0830    0.0000 O   0  0  0  0  0  0  0  0  0  0  0  0
    2.2111    4.8739    0.0000 C   0  0  0  0  0  0  0  0  0  0  0  0
    1.9975    5.6708    0.0000 C   0  0  0  0  0  0  0  0  0  0  0  0
    1.2006    5.8844    0.0000 O   0  0  0  0  0  0  0  0  0  0  0  0
   -2.6284    6.0289    0.0000 C   0  0  0  0  0  0  0  0  0  0  0  0
   -2.6284    6.8539    0.0000 O   0  0  0  0  0  0  0  0  0  0  0  0
    0.7034    4.6705    0.0000 O   0  0  0  0  0  0  0  0  0  0  0  0
   -3.4216    5.4130    0.0000 O   0  0  0  0  0  0  0  0  0  0  0  0
   -4.2466    5.4130    0.0000 P   0  0  0  0  0  0  0  0  0  0  0  0
   -5.0716    5.4130    0.0000 O   0  0  0  0  0  0  0  0  0  0  0  0
   -4.2466    6.2380    0.0000 O   0  0  0  0  0  0  0  0  0  0  0  0
   -4.2466    4.5880    0.0000 O   0  0  0  0  0  0  0  0  0  0  0  0
   -1.0841    4.6056    0.0000 N   0  0  0  0  0  0  0  0  0  0  0  0
   -1.4966    3.8911    0.0000 C   0  0  0  0  0  0  0  0  0  0  0  0
   -1.0841    3.1767    0.0000 C   0  0  0  0  0  0  0  0  0  0  0  0
   -1.4966    2.4622    0.0000 C   0  0  0  0  0  0  0  0  0  0  0  0
   -1.0841    1.7477    0.0000 C   0  0  0  0  0  0  0  0  0  0  0  0
   -1.4966    1.0333    0.0000 C   0  0  0  0  0  0  0  0  0  0  0  0
   -1.0841    0.3188    0.0000 C   0  0  0  0  0  0  0  0  0  0  0  0
   -1.4966   -0.3957    0.0000 C   0  0  0  0  0  0  0  0  0  0  0  0
   -1.0841   -1.1102    0.0000 C   0  0  0  0  0  0  0  0  0  0  0  0
   -1.4966   -1.8246    0.0000 C   0  0  0  0  0  0  0  0  0  0  0  0
   -1.0841   -2.5391    0.0000 C   0  0  0  0  0  0  0  0  0  0  0  0
   -1.4966   -3.2536    0.0000 C   0  0  0  0  0  0  0  0  0  0  0  0
   -1.0841   -3.9680    0.0000 C   0  0  0  0  0  0  0  0  0  0  0  0
   -2.3216    3.8911    0.0000 O   0  0  0  0  0  0  0  0  0  0  0  0
   -2.3216    2.4622    0.0000 O   0  0  0  0  0  0  0  0  0  0  0  0
    3.0409    3.8631    0.0000 N   0  0  0  0  0  0  0  0  0  0  0  0
    2.6284    3.1486    0.0000 C   0  0  0  0  0  0  0  0  0  0  0  0
    3.0409    2.4342    0.0000 C   0  0  0  0  0  0  0  0  0  0  0  0
    2.6284    1.7197    0.0000 C   0  0  0  0  0  0  0  0  0  0  0  0
    3.0409    1.0052    0.0000 C   0  0  0  0  0  0  0  0  0  0  0  0
    2.6284    0.2908    0.0000 C   0  0  0  0  0  0  0  0  0  0  0  0
    3.0409   -0.4237    0.0000 C   0  0  0  0  0  0  0  0  0  0  0  0
    2.6284   -1.1382    0.0000 C   0  0  0  0  0  0  0  0  0  0  0  0
    3.0409   -1.8527    0.0000 C   0  0  0  0  0  0  0  0  0  0  0  0
    2.6284   -2.5671    0.0000 C   0  0  0  0  0  0  0  0  0  0  0  0
    3.0409   -3.2816    0.0000 C   0  0  0  0  0  0  0  0  0  0  0  0
    2.6284   -3.9961    0.0000 C   0  0  0  0  0  0  0  0  0  0  0  0
    3.0409   -4.7105    0.0000 C   0  0  0  0  0  0  0  0  0  0  0  0
    1.8034    3.1486    0.0000 O   0  0  0  0  0  0  0  0  0  0  0  0
    1.8034    1.7197    0.0000 O   0  0  0  0  0  0  0  0  0  0  0  0
    3.4216    5.1935    0.0000 O   0  0  0  0  0  0  0  0  0  0  0  0
    4.2466    5.1935    0.0000 P   0  0  0  0  0  0  0  0  0  0  0  0
    5.0716    5.1935    0.0000 O   0  0  0  0  0  0  0  0  0  0  0  0
    4.2466    4.3685    0.0000 O   0  0  0  0  0  0  0  0  0  0  0  0
    4.2466    6.0185    0.0000 O   0  0  0  0  0  0  0  0  0  0  0  0
    1.3909    1.0052    0.0000 C   0  0  0  0  0  0  0  0  0  0  0  0
    1.3909   -0.4237    0.0000 C   0  0  0  0  0  0  0  0  0  0  0  0
    1.8034    0.2908    0.0000 C   0  0  0  0  0  0  0  0  0  0  0  0
    1.3909   -1.8527    0.0000 C   0  0  0  0  0  0  0  0  0  0  0  0
    1.8034   -1.1382    0.0000 C   0  0  0  0  0  0  0  0  0  0  0  0
    1.3909   -3.2816    0.0000 C   0  0  0  0  0  0  0  0  0  0  0  0
    1.8034   -2.5671    0.0000 C   0  0  0  0  0  0  0  0  0  0  0  0
    1.3909   -4.7105    0.0000 C   0  0  0  0  0  0  0  0  0  0  0  0
    1.8034   -3.9961    0.0000 C   0  0  0  0  0  0  0  0  0  0  0  0
    1.3909   -6.1395    0.0000 C   0  0  0  0  0  0  0  0  0  0  0  0
    1.8034   -5.4250    0.0000 C   0  0  0  0  0  0  0  0  0  0  0  0
    1.8034   -6.8539    0.0000 C   0  0  0  0  0  0  0  0  0  0  0  0
    0.5659    1.0052    0.0000 O   0  0  0  0  0  0  0  0  0  0  0  0
   -3.1635    4.9364    0.0000 O   0  0  0  0  0  0  0  0  0  0  0  0
   -3.5760    5.6509    0.0000 R   0  0  0  0  0  0  0  0  0  0  0  0
    0.9615    4.1939    0.0000 O   0  0  0  0  0  0  0  0  0  0  0  0
    0.5490    4.9084    0.0000 R   0  0  0  0  0  0  0  0  0  0  0  0
  4  5  1  0      
  5  6  1  0      
  6  1  1  0      
 10 11  1  0      
 11 12  1  0      
 12  7  1  0      
 12 13  1  0      
 13 14  1  0      
  4 14  1  0      
  6 15  1  0      
 15 16  1  0      
  4  3  1  1      
  3  2  1  1      
  1  2  1  1      
  7  8  1  1      
 10  9  1  1      
  8  9  1  1      
  7 17  1  0      
  1 18  1  0      
 18 19  1  0      
 19 20  1  0      
 19 21  2  0      
 19 22  1  0      
  3 23  1  0      
 23 24  1  0      
 24 25  1  0      
 25 26  1  0      
 26 27  1  0      
 27 28  1  0      
 28 29  1  0      
 29 30  1  0      
 30 31  1  0      
 31 32  1  0      
 32 33  1  0      
 33 34  1  0      
 34 35  1  0      
 24 36  2  0      
 26 37  1  1      
  9 38  1  0      
 38 39  1  0      
 39 40  1  0      
 40 41  1  0      
 41 42  1  0      
 42 43  1  0      
 43 44  1  0      
 44 45  1  0      
 45 46  1  0      
 46 47  1  0      
 47 48  1  0      
 48 49  1  0      
 49 50  1  0      
 39 51  2  0      
 41 52  1  1      
 10 53  1  0      
 53 54  1  0      
 54 55  1  0      
 54 56  2  0      
 54 57  1  0      
 52 58  1  0      
 59 60  1  0      
 60 58  1  0      
 61 62  1  0      
 62 59  1  0      
 63 64  1  0      
 64 61  1  0      
 65 66  1  0      
 66 63  1  0      
 67 68  1  0      
 68 65  1  0      
 67 69  1  0      
 58 70  2  0      
  2 71  1  0      
 71 72  1  0      
  8 73  1  0      
 73 74  1  0      
M  STY  1   1 SUP
M  SLB  1   1   1
M  SAL   1  2  71  72
M  SBL   1  1  72
M  SMT   1 OR
M  SBV   1 72   -8.8142    8.3721
M  STY  1   2 SUP
M  SLB  1   2   2
M  SAL   2  2  73  74
M  SBL   2  1  74
M  SMT   2 OR
M  SBV   2 74   -8.8142    8.3721
M  END
