# Supplementary material for: Marine Compounds with Therapeutic Potential in Gram-Negative Sepsis
Source: MDPI journal article supplement (doi:10.3390/md11062216), 2013-06-19
Supplement: s7 [file s7]

marinedrugs-11-02216-s004.mol
  corina  04151402363D 1   1.00000     0.00000 
CORINA 3.49 0023  12.04.2013
 73 74  0  0  0  0  0  0  0  0999 V2000
   -0.0187    1.5267    0.0104 C   0  0  0  0  0  0  0  0  0  0  0  0
    1.4212    2.0492   -0.0005 C   0  0  0  0  0  0  0  0  0  0  0  0
    2.1715    1.4713    1.2034 C   0  0  0  0  0  0  0  0  0  0  0  0
    2.1077   -0.0573    1.1489 C   0  0  0  0  0  0  0  0  0  0  0  0
    0.7413   -0.4753    1.1306 O   0  0  0  0  0  0  0  0  0  0  0  0
    0.0021   -0.0041    0.0020 C   0  0  0  0  0  0  0  0  0  0  0  0
    3.7865   -3.8376   -1.4664 C   0  0  0  0  0  0  0  0  0  0  0  0
    4.4490   -4.2161   -2.7946 C   0  0  0  0  0  0  0  0  0  0  0  0
    3.5733   -3.7194   -3.9491 C   0  0  0  0  0  0  0  0  0  0  0  0
    3.3696   -2.2084   -3.8113 C   0  0  0  0  0  0  0  0  0  0  0  0
    2.7785   -1.9226   -2.5420 O   0  0  0  0  0  0  0  0  0  0  0  0
    3.5745   -2.3220   -1.4245 C   0  0  0  0  0  0  0  0  0  0  0  0
    2.8587   -1.9426   -0.1266 C   0  0  0  0  0  0  0  0  0  0  0  0
    2.7635   -0.5198   -0.0335 O   0  0  0  0  0  0  0  0  0  0  0  0
   -1.4314   -0.5342    0.0735 C   0  0  0  0  0  0  0  0  0  0  0  0
   -1.4195   -1.9578   -0.0502 O   0  0  0  0  0  0  0  0  0  0  0  0
    2.5248   -4.4994   -1.3564 O   0  0  0  0  0  0  0  0  0  0  0  0
   -0.6854    1.9888    1.1869 O   0  0  0  0  0  0  0  0  0  0  0  0
    2.0684    1.6417   -1.2076 O   0  0  0  0  0  0  0  0  0  0  0  0
    3.5704    1.9047    1.1625 N   0  0  0  0  0  0  0  0  0  0  0  0
    4.2911    1.9635    2.2998 C   0  0  0  0  0  0  0  0  0  0  0  0
    5.7301    2.4093    2.2577 C   0  0  0  0  0  0  0  0  0  0  0  0
    6.3126    2.3866    3.6723 C   0  0  0  0  0  0  0  0  0  0  0  0
    7.8051    2.7182    3.6146 C   0  0  0  0  0  0  0  0  0  0  0  0
    8.4140    2.5738    5.0108 C   0  0  0  0  0  0  0  0  0  0  0  0
    9.9065    2.9055    4.9531 C   0  0  0  0  0  0  0  0  0  0  0  0
   10.5154    2.7611    6.3493 C   0  0  0  0  0  0  0  0  0  0  0  0
   12.0079    3.0928    6.2916 C   0  0  0  0  0  0  0  0  0  0  0  0
   12.6168    2.9484    7.6878 C   0  0  0  0  0  0  0  0  0  0  0  0
   14.1093    3.2800    7.6301 C   0  0  0  0  0  0  0  0  0  0  0  0
    3.7817    1.6577    3.3571 O   0  0  0  0  0  0  0  0  0  0  0  0
    5.6295    3.3705    4.4929 O   0  0  0  0  0  0  0  0  0  0  0  0
    5.5307    3.1066    5.8053 C   0  0  0  0  0  0  0  0  0  0  0  0
    4.8614    3.5455    8.1523 C   0  0  0  0  0  0  0  0  0  0  0  0
    4.8350    4.0818    6.7197 C   0  0  0  0  0  0  0  0  0  0  0  0
    4.1551    4.5356    9.0807 C   0  0  0  0  0  0  0  0  0  0  0  0
    4.1815    3.9992   10.5133 C   0  0  0  0  0  0  0  0  0  0  0  0
    3.4752    4.9893   11.4417 C   0  0  0  0  0  0  0  0  0  0  0  0
    3.5016    4.4529   12.8743 C   0  0  0  0  0  0  0  0  0  0  0  0
    2.7953    5.4430   13.8027 C   0  0  0  0  0  0  0  0  0  0  0  0
    5.9994    2.0872    6.2535 O   0  0  0  0  0  0  0  0  0  0  0  0
    5.7595   -3.5965   -2.8777 O   0  0  0  0  0  0  0  0  0  0  0  0
    6.7971   -4.2984   -2.3952 C   0  0  0  0  0  0  0  0  0  0  0  0
    9.1771   -4.7146   -1.8375 C   0  0  0  0  0  0  0  0  0  0  0  0
    8.1876   -3.7197   -2.4472 C   0  0  0  0  0  0  0  0  0  0  0  0
   11.5989   -5.2317   -1.5059 C   0  0  0  0  0  0  0  0  0  0  0  0
   10.6021   -4.1825   -2.0024 C   0  0  0  0  0  0  0  0  0  0  0  0
   14.0207   -5.7489   -1.1743 C   0  0  0  0  0  0  0  0  0  0  0  0
   13.0239   -4.6997   -1.6708 C   0  0  0  0  0  0  0  0  0  0  0  0
   16.4425   -6.2661   -0.8428 C   0  0  0  0  0  0  0  0  0  0  0  0
   15.4457   -5.2169   -1.3392 C   0  0  0  0  0  0  0  0  0  0  0  0
   17.8675   -5.7341   -1.0077 C   0  0  0  0  0  0  0  0  0  0  0  0
    6.6161   -5.3941   -1.9193 O   0  0  0  0  0  0  0  0  0  0  0  0
    8.8890   -4.8820   -0.4479 O   0  0  0  0  0  0  0  0  0  0  0  0
    4.2333   -4.0101   -5.2243 N   0  0  0  0  0  0  0  0  0  0  0  0
    3.5009   -4.1374   -6.3485 C   0  0  0  0  0  0  0  0  0  0  0  0
    4.1798   -4.4364   -7.6603 C   0  0  0  0  0  0  0  0  0  0  0  0
    3.1292   -4.5296   -8.7687 C   0  0  0  0  0  0  0  0  0  0  0  0
    3.8266   -4.7090  -10.1186 C   0  0  0  0  0  0  0  0  0  0  0  0
    2.7850   -4.6772  -11.2389 C   0  0  0  0  0  0  0  0  0  0  0  0
    3.4824   -4.8566  -12.5889 C   0  0  0  0  0  0  0  0  0  0  0  0
    2.4409   -4.8248  -13.7092 C   0  0  0  0  0  0  0  0  0  0  0  0
    3.1383   -5.0042  -15.0591 C   0  0  0  0  0  0  0  0  0  0  0  0
    2.0967   -4.9724  -16.1794 C   0  0  0  0  0  0  0  0  0  0  0  0
    2.7941   -5.1518  -17.5294 C   0  0  0  0  0  0  0  0  0  0  0  0
    2.2955   -4.0112   -6.3045 O   0  0  0  0  0  0  0  0  0  0  0  0
    4.6323   -1.5464   -3.9089 O   0  0  0  0  0  0  0  0  0  0  0  0
    4.7982   -0.0566   -4.4963 P   0  0  0  0  0  0  0  0  0  0  0  0
    4.3942   -0.0461   -6.0547 O   0  0  0  0  0  0  0  0  0  0  0  0
    3.9152    0.8686   -3.7515 O   0  0  0  0  0  0  0  0  0  0  0  0
    6.3288    0.4163   -4.3355 O   0  0  0  0  0  0  0  0  0  0  0  0
    2.2743   -5.6478   -8.5219 O   0  0  0  0  0  0  0  0  0  0  0  0
    1.1424   -5.3424   -7.7385 R   0  0  0  0  0  0  0  0  0  0  0  0
  4  5  1  0      
  5  6  1  0      
  6  1  1  0      
 10 11  1  0      
 11 12  1  0      
 12  7  1  0      
 12 13  1  0      
 13 14  1  0      
  4 14  1  0      
  6 15  1  0      
 15 16  1  0      
  4  3  1  0      
  3  2  1  0      
  1  2  1  0      
  7  8  1  0      
 10  9  1  0      
  8  9  1  0      
  7 17  1  0      
  1 18  1  0      
  2 19  1  0      
  3 20  1  0      
 20 21  1  0      
 21 22  1  0      
 22 23  1  0      
 23 24  1  0      
 24 25  1  0      
 25 26  1  0      
 26 27  1  0      
 27 28  1  0      
 28 29  1  0      
 29 30  1  0      
 21 31  2  0      
 23 32  1  0      
 32 33  1  0      
 34 35  1  0      
 35 33  1  0      
 34 36  1  0      
 36 37  1  0      
 37 38  1  0      
 38 39  1  0      
 39 40  1  0      
 33 41  2  0      
  8 42  1  0      
 42 43  1  0      
 44 45  1  0      
 45 43  1  0      
 46 47  1  0      
 47 44  1  0      
 48 49  1  0      
 49 46  1  0      
 50 51  1  0      
 51 48  1  0      
 52 50  1  0      
 43 53  2  0      
 44 54  1  0      
  9 55  1  0      
 55 56  1  0      
 56 57  1  0      
 57 58  1  0      
 58 59  1  0      
 59 60  1  0      
 60 61  1  0      
 61 62  1  0      
 62 63  1  0      
 63 64  1  0      
 64 65  1  0      
 56 66  2  0      
 10 67  1  0      
 67 68  1  0      
 68 69  1  0      
 68 70  2  0      
 68 71  1  0      
 58 72  1  0      
 72 73  1  0      
M  STY  1   1 SUP
M  SLB  1   1   1
M  SAL   1  2  72  73
M  SBL   1  1  73
M  SMT   1 OR
M  SBV   1 73   -8.0417    7.4685
M  END
$$$$
