# Supplementary material for: Marine Compounds with Therapeutic Potential in Gram-Negative Sepsis
Source: MDPI journal article supplement (doi:10.3390/md11062216), 2013-06-19
Supplement: s8 [file s8]

marinedrugs-11-02216-s004.mol
  ChemDraw02071408482D

 73 74  0  0  0  0  0  0  0  0999 V2000
   -3.4635    4.0393    0.0000 C   0  0  0  0  0  0  0  0  0  0  0  0
   -3.0510    3.3248    0.0000 C   0  0  0  0  0  0  0  0  0  0  0  0
   -2.2529    3.5339    0.0000 C   0  0  0  0  0  0  0  0  0  0  0  0
   -1.4596    3.3248    0.0000 C   0  0  0  0  0  0  0  0  0  0  0  0
   -1.8721    4.0393    0.0000 O   0  0  0  0  0  0  0  0  0  0  0  0
   -2.6702    3.8303    0.0000 C   0  0  0  0  0  0  0  0  0  0  0  0
    0.6615    3.2968    0.0000 C   0  0  0  0  0  0  0  0  0  0  0  0
    1.0740    2.5823    0.0000 C   0  0  0  0  0  0  0  0  0  0  0  0
    1.8721    2.7914    0.0000 C   0  0  0  0  0  0  0  0  0  0  0  0
    2.6654    2.5823    0.0000 C   0  0  0  0  0  0  0  0  0  0  0  0
    2.2529    3.2968    0.0000 O   0  0  0  0  0  0  0  0  0  0  0  0
    1.4548    3.0878    0.0000 C   0  0  0  0  0  0  0  0  0  0  0  0
    1.2413    3.8847    0.0000 C   0  0  0  0  0  0  0  0  0  0  0  0
    0.4444    4.0982    0.0000 O   0  0  0  0  0  0  0  0  0  0  0  0
   -3.3847    4.2428    0.0000 C   0  0  0  0  0  0  0  0  0  0  0  0
   -3.3847    5.0678    0.0000 O   0  0  0  0  0  0  0  0  0  0  0  0
   -0.0529    2.8843    0.0000 O   0  0  0  0  0  0  0  0  0  0  0  0
   -4.1779    3.6268    0.0000 O   0  0  0  0  0  0  0  0  0  0  0  0
   -3.8478    3.1113    0.0000 O   0  0  0  0  0  0  0  0  0  0  0  0
   -1.8404    2.8194    0.0000 N   0  0  0  0  0  0  0  0  0  0  0  0
   -2.2529    2.1050    0.0000 C   0  0  0  0  0  0  0  0  0  0  0  0
   -1.8404    1.3905    0.0000 C   0  0  0  0  0  0  0  0  0  0  0  0
   -2.2529    0.6760    0.0000 C   0  0  0  0  0  0  0  0  0  0  0  0
   -1.8404   -0.0384    0.0000 C   0  0  0  0  0  0  0  0  0  0  0  0
   -2.2529   -0.7529    0.0000 C   0  0  0  0  0  0  0  0  0  0  0  0
   -1.8404   -1.4674    0.0000 C   0  0  0  0  0  0  0  0  0  0  0  0
   -2.2529   -2.1819    0.0000 C   0  0  0  0  0  0  0  0  0  0  0  0
   -1.8404   -2.8963    0.0000 C   0  0  0  0  0  0  0  0  0  0  0  0
   -2.2529   -3.6108    0.0000 C   0  0  0  0  0  0  0  0  0  0  0  0
   -1.8404   -4.3253    0.0000 C   0  0  0  0  0  0  0  0  0  0  0  0
   -3.0779    2.1050    0.0000 O   0  0  0  0  0  0  0  0  0  0  0  0
   -3.0779    0.6760    0.0000 O   0  0  0  0  0  0  0  0  0  0  0  0
   -3.4904   -0.0384    0.0000 C   0  0  0  0  0  0  0  0  0  0  0  0
   -3.4904   -1.4674    0.0000 C   0  0  0  0  0  0  0  0  0  0  0  0
   -3.0779   -0.7529    0.0000 C   0  0  0  0  0  0  0  0  0  0  0  0
   -3.0779   -2.1819    0.0000 C   0  0  0  0  0  0  0  0  0  0  0  0
   -3.4904   -2.8963    0.0000 C   0  0  0  0  0  0  0  0  0  0  0  0
   -3.0779   -3.6108    0.0000 C   0  0  0  0  0  0  0  0  0  0  0  0
   -3.4904   -4.3253    0.0000 C   0  0  0  0  0  0  0  0  0  0  0  0
   -3.0779   -5.0397    0.0000 C   0  0  0  0  0  0  0  0  0  0  0  0
   -4.3154   -0.0384    0.0000 O   0  0  0  0  0  0  0  0  0  0  0  0
    0.2772    2.7958    0.0000 O   0  0  0  0  0  0  0  0  0  0  0  0
   -0.1353    2.0814    0.0000 C   0  0  0  0  0  0  0  0  0  0  0  0
   -0.1353    0.6524    0.0000 C   0  0  0  0  0  0  0  0  0  0  0  0
    0.2772    1.3669    0.0000 C   0  0  0  0  0  0  0  0  0  0  0  0
   -0.1353   -0.7765    0.0000 C   0  0  0  0  0  0  0  0  0  0  0  0
    0.2772   -0.0620    0.0000 C   0  0  0  0  0  0  0  0  0  0  0  0
   -0.1353   -2.2055    0.0000 C   0  0  0  0  0  0  0  0  0  0  0  0
    0.2772   -1.4910    0.0000 C   0  0  0  0  0  0  0  0  0  0  0  0
   -0.1353   -3.6344    0.0000 C   0  0  0  0  0  0  0  0  0  0  0  0
    0.2772   -2.9199    0.0000 C   0  0  0  0  0  0  0  0  0  0  0  0
    0.2772   -4.3489    0.0000 C   0  0  0  0  0  0  0  0  0  0  0  0
   -0.9603    2.0814    0.0000 O   0  0  0  0  0  0  0  0  0  0  0  0
   -0.9603    0.6524    0.0000 O   0  0  0  0  0  0  0  0  0  0  0  0
    2.2846    2.0769    0.0000 N   0  0  0  0  0  0  0  0  0  0  0  0
    1.8721    1.3625    0.0000 C   0  0  0  0  0  0  0  0  0  0  0  0
    2.2846    0.6480    0.0000 C   0  0  0  0  0  0  0  0  0  0  0  0
    1.8721   -0.0665    0.0000 C   0  0  0  0  0  0  0  0  0  0  0  0
    2.2846   -0.7809    0.0000 C   0  0  0  0  0  0  0  0  0  0  0  0
    1.8721   -1.4954    0.0000 C   0  0  0  0  0  0  0  0  0  0  0  0
    2.2846   -2.2099    0.0000 C   0  0  0  0  0  0  0  0  0  0  0  0
    1.8721   -2.9244    0.0000 C   0  0  0  0  0  0  0  0  0  0  0  0
    2.2846   -3.6388    0.0000 C   0  0  0  0  0  0  0  0  0  0  0  0
    1.8721   -4.3533    0.0000 C   0  0  0  0  0  0  0  0  0  0  0  0
    2.2846   -5.0678    0.0000 C   0  0  0  0  0  0  0  0  0  0  0  0
    1.0471    1.3625    0.0000 O   0  0  0  0  0  0  0  0  0  0  0  0
    2.6654    3.4073    0.0000 O   0  0  0  0  0  0  0  0  0  0  0  0
    3.4904    3.4073    0.0000 P   0  0  0  0  0  0  0  0  0  0  0  0
    4.3154    3.4073    0.0000 O   0  0  0  0  0  0  0  0  0  0  0  0
    3.4904    2.5823    0.0000 O   0  0  0  0  0  0  0  0  0  0  0  0
    3.4904    4.2323    0.0000 O   0  0  0  0  0  0  0  0  0  0  0  0
    1.2533    0.2909    0.0000 O   0  0  0  0  0  0  0  0  0  0  0  0
    1.9678   -0.1216    0.0000 R   0  0  0  0  0  0  0  0  0  0  0  0
  4  5  1  0      
  5  6  1  0      
  6  1  1  0      
 10 11  1  0      
 11 12  1  0      
 12  7  1  0      
 12 13  1  0      
 13 14  1  0      
  4 14  1  0      
  6 15  1  0      
 15 16  1  0      
  4  3  1  1      
  3  2  1  1      
  1  2  1  1      
  7  8  1  1      
 10  9  1  1      
  8  9  1  1      
  7 17  1  0      
  1 18  1  0      
  2 19  1  0      
  3 20  1  0      
 20 21  1  0      
 21 22  1  0      
 22 23  1  0      
 23 24  1  0      
 24 25  1  0      
 25 26  1  0      
 26 27  1  0      
 27 28  1  0      
 28 29  1  0      
 29 30  1  0      
 21 31  2  0      
 23 32  1  1      
 32 33  1  0      
 34 35  1  0      
 35 33  1  0      
 34 36  1  0      
 36 37  1  0      
 37 38  1  0      
 38 39  1  0      
 39 40  1  0      
 33 41  2  0      
  8 42  1  0      
 42 43  1  0      
 44 45  1  0      
 45 43  1  0      
 46 47  1  0      
 47 44  1  0      
 48 49  1  0      
 49 46  1  0      
 50 51  1  0      
 51 48  1  0      
 52 50  1  0      
 43 53  2  0      
 44 54  1  1      
  9 55  1  0      
 55 56  1  0      
 56 57  1  0      
 57 58  1  0      
 58 59  1  0      
 59 60  1  0      
 60 61  1  0      
 61 62  1  0      
 62 63  1  0      
 63 64  1  0      
 64 65  1  0      
 56 66  2  0      
 10 67  1  0      
 67 68  1  0      
 68 69  1  0      
 68 70  2  0      
 68 71  1  0      
 58 72  1  1      
 72 73  1  0      
M  STY  1   1 SUP
M  SLB  1   1   1
M  SAL   1  2  72  73
M  SBL   1  1  73
M  SMT   1 OR
M  SBV   1 73   -8.0417    7.4685
M  END
