# Supplementary material for: Marine Compounds with Therapeutic Potential in Gram-Negative Sepsis
Source: MDPI journal article supplement (doi:10.3390/md11062216), 2013-06-19
Supplement: s9 [file s9]

marinedrugs-11-02216-s005.mol
  corina  04151402373D 1   1.00000     0.00000 
CORINA 3.49 0023  12.04.2013
 52 52  0  0  0  0  0  0  0  0999 V2000
   -0.0187    1.5267    0.0104 C   0  0  0  0  0  0  0  0  0  0  0  0
    1.4212    2.0492   -0.0005 C   0  0  0  0  0  0  0  0  0  0  0  0
    2.1715    1.4713    1.2034 C   0  0  0  0  0  0  0  0  0  0  0  0
    2.1077   -0.0573    1.1489 C   0  0  0  0  0  0  0  0  0  0  0  0
    0.7413   -0.4753    1.1306 O   0  0  0  0  0  0  0  0  0  0  0  0
    0.0021   -0.0041    0.0020 C   0  0  0  0  0  0  0  0  0  0  0  0
   -1.4314   -0.5342    0.0735 C   0  0  0  0  0  0  0  0  0  0  0  0
   -1.4195   -1.9578   -0.0502 O   0  0  0  0  0  0  0  0  0  0  0  0
   -0.6854    1.9888    1.1869 O   0  0  0  0  0  0  0  0  0  0  0  0
    2.0788    1.6351   -1.2271 O   0  0  0  0  0  0  0  0  0  0  0  0
    1.9866    2.4650   -2.2780 C   0  0  0  0  0  0  0  0  0  0  0  0
    2.3886    3.2096   -4.6089 C   0  0  0  0  0  0  0  0  0  0  0  0
    2.6439    2.1021   -3.5847 C   0  0  0  0  0  0  0  0  0  0  0  0
    3.0041    4.0688   -6.8729 C   0  0  0  0  0  0  0  0  0  0  0  0
    3.1583    2.9022   -5.8950 C   0  0  0  0  0  0  0  0  0  0  0  0
    3.6195    4.9279   -9.1368 C   0  0  0  0  0  0  0  0  0  0  0  0
    3.7737    3.7613   -8.1589 C   0  0  0  0  0  0  0  0  0  0  0  0
    4.2349    5.7870  -11.4008 C   0  0  0  0  0  0  0  0  0  0  0  0
    4.3892    4.6205  -10.4229 C   0  0  0  0  0  0  0  0  0  0  0  0
    5.0046    5.4796  -12.6869 C   0  0  0  0  0  0  0  0  0  0  0  0
    1.3765    3.5030   -2.1765 O   0  0  0  0  0  0  0  0  0  0  0  0
    0.9905    3.2801   -4.8958 O   0  0  0  0  0  0  0  0  0  0  0  0
    3.5704    1.9047    1.1625 N   0  0  0  0  0  0  0  0  0  0  0  0
    4.2911    1.9635    2.2998 C   0  0  0  0  0  0  0  0  0  0  0  0
    5.7301    2.4093    2.2577 C   0  0  0  0  0  0  0  0  0  0  0  0
    6.3126    2.3866    3.6723 C   0  0  0  0  0  0  0  0  0  0  0  0
    7.8051    2.7182    3.6146 C   0  0  0  0  0  0  0  0  0  0  0  0
    8.4140    2.5738    5.0108 C   0  0  0  0  0  0  0  0  0  0  0  0
    9.9065    2.9055    4.9531 C   0  0  0  0  0  0  0  0  0  0  0  0
   10.5154    2.7611    6.3493 C   0  0  0  0  0  0  0  0  0  0  0  0
   12.0079    3.0928    6.2916 C   0  0  0  0  0  0  0  0  0  0  0  0
   12.6168    2.9484    7.6878 C   0  0  0  0  0  0  0  0  0  0  0  0
   14.1093    3.2800    7.6301 C   0  0  0  0  0  0  0  0  0  0  0  0
    3.7817    1.6577    3.3571 O   0  0  0  0  0  0  0  0  0  0  0  0
    5.6403    3.3550    4.4799 O   0  0  0  0  0  0  0  0  0  0  0  0
    2.7635   -0.5198   -0.0335 O   0  0  0  0  0  0  0  0  0  0  0  0
    3.5066   -1.9452   -0.1235 P   0  0  0  0  0  0  0  0  0  0  0  0
    4.7675   -1.9572    0.8775 O   0  0  0  0  0  0  0  0  0  0  0  0
    2.5625   -3.0188    0.2593 O   0  0  0  0  0  0  0  0  0  0  0  0
    4.0158   -2.1907   -1.6310 O   0  0  0  0  0  0  0  0  0  0  0  0
    4.8503    6.6461  -13.6648 C   0  0  0  0  0  0  0  0  0  0  0  0
    5.6200    6.3387  -14.9509 C   0  0  0  0  0  0  0  0  0  0  0  0
    5.4658    7.5053  -15.9288 C   0  0  0  0  0  0  0  0  0  0  0  0
    6.1341    8.7517  -15.3452 C   0  0  0  0  0  0  0  0  0  0  0  0
    6.1297    7.1463  -17.2596 C   0  0  0  0  0  0  0  0  0  0  0  0
   14.7181    3.1356    9.0262 C   0  0  0  0  0  0  0  0  0  0  0  0
   16.2106    3.4673    8.9685 C   0  0  0  0  0  0  0  0  0  0  0  0
   16.8195    3.3229   10.3647 C   0  0  0  0  0  0  0  0  0  0  0  0
   18.3120    3.6546   10.3070 C   0  0  0  0  0  0  0  0  0  0  0  0
   18.9209    3.5102   11.7032 C   0  0  0  0  0  0  0  0  0  0  0  0
   18.8483    2.0463   12.1424 C   0  0  0  0  0  0  0  0  0  0  0  0
   20.3826    3.9611   11.6713 C   0  0  0  0  0  0  0  0  0  0  0  0
  4  5  1  0      
  5  6  1  0      
  6  1  1  0      
  6  7  1  0      
  7  8  1  0      
  1  2  1  0      
  4  3  1  0      
  2  3  1  0      
  1  9  1  0      
  2 10  1  0      
 10 11  1  0      
 12 13  1  0      
 13 11  1  0      
 14 15  1  0      
 15 12  1  0      
 16 17  1  0      
 17 14  1  0      
 18 19  1  0      
 19 16  1  0      
 20 18  1  0      
 11 21  2  0      
 12 22  1  0      
  3 23  1  0      
 23 24  1  0      
 24 25  1  0      
 25 26  1  0      
 26 27  1  0      
 27 28  1  0      
 28 29  1  0      
 29 30  1  0      
 30 31  1  0      
 31 32  1  0      
 32 33  1  0      
 24 34  2  0      
 26 35  1  0      
  4 36  1  0      
 36 37  1  0      
 37 38  1  0      
 37 39  2  0      
 37 40  1  0      
 20 41  1  0      
 41 42  1  0      
 42 43  1  0      
 43 44  1  0      
 43 45  1  0      
 33 46  1  0      
 46 47  1  0      
 47 48  1  0      
 48 49  1  0      
 49 50  1  0      
 50 51  1  0      
 50 52  1  0      
M  END
$$$$
