# Supplementary material for: Marine Compounds with Therapeutic Potential in Gram-Negative Sepsis
Source: MDPI journal article supplement (doi:10.3390/md11062216), 2013-06-19
Supplement: s10 [file s10]

marinedrugs-11-02216-s005.mol
  ChemDraw02071408482D

 52 52  0  0  0  0  0  0  0  0999 V2000
   -1.0160    5.8255    0.0000 C   0  0  0  0  0  0  0  0  0  0  0  0
   -0.6035    5.1110    0.0000 C   0  0  0  0  0  0  0  0  0  0  0  0
    0.1946    5.3201    0.0000 C   0  0  0  0  0  0  0  0  0  0  0  0
    0.9879    5.1110    0.0000 C   0  0  0  0  0  0  0  0  0  0  0  0
    0.5754    5.8255    0.0000 O   0  0  0  0  0  0  0  0  0  0  0  0
   -0.2227    5.6165    0.0000 C   0  0  0  0  0  0  0  0  0  0  0  0
   -0.4363    6.4134    0.0000 C   0  0  0  0  0  0  0  0  0  0  0  0
    0.2782    6.8259    0.0000 O   0  0  0  0  0  0  0  0  0  0  0  0
   -1.7304    5.4130    0.0000 O   0  0  0  0  0  0  0  0  0  0  0  0
   -1.4004    5.3246    0.0000 O   0  0  0  0  0  0  0  0  0  0  0  0
   -1.8129    4.6101    0.0000 C   0  0  0  0  0  0  0  0  0  0  0  0
   -1.8129    3.1811    0.0000 C   0  0  0  0  0  0  0  0  0  0  0  0
   -1.4004    3.8956    0.0000 C   0  0  0  0  0  0  0  0  0  0  0  0
   -1.8129    1.7522    0.0000 C   0  0  0  0  0  0  0  0  0  0  0  0
   -1.4004    2.4667    0.0000 C   0  0  0  0  0  0  0  0  0  0  0  0
   -1.8129    0.3233    0.0000 C   0  0  0  0  0  0  0  0  0  0  0  0
   -1.4004    1.0377    0.0000 C   0  0  0  0  0  0  0  0  0  0  0  0
   -1.8129   -1.1057    0.0000 C   0  0  0  0  0  0  0  0  0  0  0  0
   -1.4004   -0.3912    0.0000 C   0  0  0  0  0  0  0  0  0  0  0  0
   -1.4004   -1.8202    0.0000 C   0  0  0  0  0  0  0  0  0  0  0  0
   -2.6379    4.6101    0.0000 O   0  0  0  0  0  0  0  0  0  0  0  0
   -2.6379    3.1811    0.0000 O   0  0  0  0  0  0  0  0  0  0  0  0
    0.6071    4.6057    0.0000 N   0  0  0  0  0  0  0  0  0  0  0  0
    0.1946    3.8912    0.0000 C   0  0  0  0  0  0  0  0  0  0  0  0
    0.6071    3.1767    0.0000 C   0  0  0  0  0  0  0  0  0  0  0  0
    0.1946    2.4622    0.0000 C   0  0  0  0  0  0  0  0  0  0  0  0
    0.6071    1.7478    0.0000 C   0  0  0  0  0  0  0  0  0  0  0  0
    0.1946    1.0333    0.0000 C   0  0  0  0  0  0  0  0  0  0  0  0
    0.6071    0.3188    0.0000 C   0  0  0  0  0  0  0  0  0  0  0  0
    0.1946   -0.3956    0.0000 C   0  0  0  0  0  0  0  0  0  0  0  0
    0.6071   -1.1101    0.0000 C   0  0  0  0  0  0  0  0  0  0  0  0
    0.1946   -1.8246    0.0000 C   0  0  0  0  0  0  0  0  0  0  0  0
    0.6071   -2.5391    0.0000 C   0  0  0  0  0  0  0  0  0  0  0  0
   -0.6304    3.8912    0.0000 O   0  0  0  0  0  0  0  0  0  0  0  0
   -0.6304    2.4622    0.0000 O   0  0  0  0  0  0  0  0  0  0  0  0
    0.9879    5.9360    0.0000 O   0  0  0  0  0  0  0  0  0  0  0  0
    1.8129    5.9360    0.0000 P   0  0  0  0  0  0  0  0  0  0  0  0
    2.6379    5.9360    0.0000 O   0  0  0  0  0  0  0  0  0  0  0  0
    1.8129    5.1110    0.0000 O   0  0  0  0  0  0  0  0  0  0  0  0
    1.8129    6.7610    0.0000 O   0  0  0  0  0  0  0  0  0  0  0  0
   -1.8129   -2.5346    0.0000 C   0  0  0  0  0  0  0  0  0  0  0  0
   -1.4004   -3.2491    0.0000 C   0  0  0  0  0  0  0  0  0  0  0  0
   -1.8129   -3.9636    0.0000 C   0  0  0  0  0  0  0  0  0  0  0  0
   -1.4004   -4.6780    0.0000 C   0  0  0  0  0  0  0  0  0  0  0  0
   -2.2254   -4.6780    0.0000 C   0  0  0  0  0  0  0  0  0  0  0  0
    0.1946   -3.2535    0.0000 C   0  0  0  0  0  0  0  0  0  0  0  0
    0.6071   -3.9680    0.0000 C   0  0  0  0  0  0  0  0  0  0  0  0
    0.1946   -4.6825    0.0000 C   0  0  0  0  0  0  0  0  0  0  0  0
    0.6071   -5.3969    0.0000 C   0  0  0  0  0  0  0  0  0  0  0  0
    0.1946   -6.1114    0.0000 C   0  0  0  0  0  0  0  0  0  0  0  0
    0.6071   -6.8259    0.0000 C   0  0  0  0  0  0  0  0  0  0  0  0
   -0.2179   -6.8259    0.0000 C   0  0  0  0  0  0  0  0  0  0  0  0
  4  5  1  0      
  5  6  1  0      
  6  1  1  0      
  6  7  1  0      
  7  8  1  0      
  1  2  1  1      
  4  3  1  1      
  2  3  1  1      
  1  9  1  0      
  2 10  1  0      
 10 11  1  0      
 12 13  1  0      
 13 11  1  0      
 14 15  1  0      
 15 12  1  0      
 16 17  1  0      
 17 14  1  0      
 18 19  1  0      
 19 16  1  0      
 20 18  1  0      
 11 21  2  0      
 12 22  1  1      
  3 23  1  0      
 23 24  1  0      
 24 25  1  0      
 25 26  1  0      
 26 27  1  0      
 27 28  1  0      
 28 29  1  0      
 29 30  1  0      
 30 31  1  0      
 31 32  1  0      
 32 33  1  0      
 24 34  2  0      
 26 35  1  1      
  4 36  1  0      
 36 37  1  0      
 37 38  1  0      
 37 39  2  0      
 37 40  1  0      
 20 41  1  0      
 41 42  1  0      
 42 43  1  0      
 43 44  1  0      
 43 45  1  0      
 33 46  1  0      
 46 47  1  0      
 47 48  1  0      
 48 49  1  0      
 49 50  1  0      
 50 51  1  0      
 50 52  1  0      
M  END
