# Supplementary material for: Marine Compounds with Therapeutic Potential in Gram-Negative Sepsis
Source: MDPI journal article supplement (doi:10.3390/md11062216), 2013-06-19
Supplement: s11 [file s11]

marinedrugs-11-02216-s006-2.mol
  corina  04151402373D 1   1.00000     0.00000 
CORINA 3.49 0023  12.04.2013
 29 29  0  0  0  0  0  0  0  0999 V2000
   -0.0187    1.5267    0.0104 C   0  0  0  0  0  0  0  0  0  0  0  0
    1.4212    2.0492   -0.0005 C   0  0  0  0  0  0  0  0  0  0  0  0
    2.1715    1.4713    1.2034 C   0  0  0  0  0  0  0  0  0  0  0  0
    2.1077   -0.0573    1.1489 C   0  0  0  0  0  0  0  0  0  0  0  0
    0.7413   -0.4753    1.1306 O   0  0  0  0  0  0  0  0  0  0  0  0
    0.0021   -0.0041    0.0020 C   0  0  0  0  0  0  0  0  0  0  0  0
    2.0684    1.6417   -1.2076 O   0  0  0  0  0  0  0  0  0  0  0  0
   -1.4314   -0.5342    0.0735 C   0  0  0  0  0  0  0  0  0  0  0  0
   -1.4195   -1.9578   -0.0502 O   0  0  0  0  0  0  0  0  0  0  0  0
    3.5742    1.9059    1.1624 N   0  0  0  0  0  0  0  0  0  0  0  0
    2.7635   -0.5198   -0.0335 O   0  0  0  0  0  0  0  0  0  0  0  0
    3.3517   -1.7945    0.0982 *   0  0  0  0  0  0  0  0  0  0  0  0
   -0.7465    2.0311    1.2947 *   0  0  0  0  0  0  0  0  0  0  0  0
    9.9869   10.5336    7.5128 C   0  0  0  0  0  0  0  0  0  0  0  0
   11.4267   11.0561    7.5018 C   0  0  0  0  0  0  0  0  0  0  0  0
   12.1771   10.4782    8.7058 C   0  0  0  0  0  0  0  0  0  0  0  0
   12.1132    8.9496    8.6513 C   0  0  0  0  0  0  0  0  0  0  0  0
   10.7468    8.5316    8.6329 O   0  0  0  0  0  0  0  0  0  0  0  0
   10.0076    9.0029    7.5044 C   0  0  0  0  0  0  0  0  0  0  0  0
   12.0740   10.6486    6.2947 O   0  0  0  0  0  0  0  0  0  0  0  0
    8.5742    8.4727    7.5758 C   0  0  0  0  0  0  0  0  0  0  0  0
    8.5861    7.0492    7.4521 O   0  0  0  0  0  0  0  0  0  0  0  0
   12.7690    8.4871    7.4689 O   0  0  0  0  0  0  0  0  0  0  0  0
   13.3572    7.2125    7.6006 *   0  0  0  0  0  0  0  0  0  0  0  0
    9.2590   11.0381    8.7970 *   0  0  0  0  0  0  0  0  0  0  0  0
   13.5759   10.9116    8.6648 N   0  0  0  0  0  0  0  0  0  0  0  0
   14.2967   10.9705    9.8022 C   0  0  0  0  0  0  0  0  0  0  0  0
   13.7873   10.6647   10.8595 O   0  0  0  0  0  0  0  0  0  0  0  0
   15.7356   11.4162    9.7601 C   0  0  0  0  0  0  0  0  0  0  0  0
  4  5  1  0      
  5  6  1  0      
  6  1  1  0      
  4  3  1  0      
  3  2  1  0      
  1  2  1  0      
  2  7  1  0      
  6  8  1  0      
  8  9  1  0      
  3 10  1  0      
  4 11  1  0      
 11 12  1  0      
  1 13  1  0      
 17 18  1  0      
 18 19  1  0      
 19 14  1  0      
 17 16  1  0      
 16 15  1  0      
 14 15  1  0      
 15 20  1  0      
 19 21  1  0      
 21 22  1  0      
 17 23  1  0      
 23 24  1  0      
 14 25  1  0      
 16 26  1  0      
 26 27  1  0      
 27 28  2  0      
 27 29  1  0      
M  STY  1   1 SUP
M  SLB  1   1   1
M  SAL   1  4  26  27  28  29
M  SBL   1  1  26
M  SMT   1 NHCOCH3
M  SBV   1 26   -7.3567    4.5320
M  STY  1   2 SRU
M  SLB  1   2   2
M  SCN  1   2 HT 
M  SAL   2 11   4   5   6   1   2   3  11   7   8   9  10
M  SBL   2  2  12  13
M  SMT   2 n
M  SDI   2  4   -0.5112    0.6456   -0.5112   -0.1794
M  SDI   2  4   -4.1088    0.1080   -4.1088    0.9330
M  STY  1   3 SRU
M  SLB  1   3   3
M  SCN  1   3 HT 
M  SAL   3 11  26  14  15  16  17  18  19  20  21  22  23
M  SBL   3  2  24  25
M  SMT   3 m
M  SDI   3  4    4.1088    0.5573    4.1088   -0.2677
M  SDI   3  4    0.5112    0.0197    0.5112    0.8447
M  END
$$$$
