# Supplementary material for: Marine Compounds with Therapeutic Potential in Gram-Negative Sepsis
Source: MDPI journal article supplement (doi:10.3390/md11062216), 2013-06-19
Supplement: s12 [file s12]

marinedrugs-11-02216-s006-2.mol
  ChemDraw04151414002D

 29 29  0  0  0  0  0  0  0  0999 V2000
   -3.7104    0.6273    0.0000 C   0  0  0  0  0  0  0  0  0  0  0  0
   -3.2979   -0.0872    0.0000 C   0  0  0  0  0  0  0  0  0  0  0  0
   -2.4998    0.1219    0.0000 C   0  0  0  0  0  0  0  0  0  0  0  0
   -1.7065   -0.0872    0.0000 C   0  0  0  0  0  0  0  0  0  0  0  0
   -2.1190    0.6273    0.0000 O   0  0  0  0  0  0  0  0  0  0  0  0
   -2.9171    0.4182    0.0000 C   0  0  0  0  0  0  0  0  0  0  0  0
   -4.0947   -0.3007    0.0000 O   0  0  0  0  0  0  0  0  0  0  0  0
   -3.6316    0.8307    0.0000 C   0  0  0  0  0  0  0  0  0  0  0  0
   -3.6316    1.6557    0.0000 O   0  0  0  0  0  0  0  0  0  0  0  0
   -2.0873   -0.5925    0.0000 N   0  0  0  0  0  0  0  0  0  0  0  0
   -0.9096    0.1263    0.0000 O   0  0  0  0  0  0  0  0  0  0  0  0
   -0.1128    0.3398    0.0000 *   0  0  0  0  0  0  0  0  0  0  0  0
   -4.5072    0.4137    0.0000 *   0  0  0  0  0  0  0  0  0  0  0  0
    0.9096    0.5390    0.0000 C   0  0  0  0  0  0  0  0  0  0  0  0
    1.3221   -0.1755    0.0000 C   0  0  0  0  0  0  0  0  0  0  0  0
    2.1202    0.0336    0.0000 C   0  0  0  0  0  0  0  0  0  0  0  0
    2.9135   -0.1755    0.0000 C   0  0  0  0  0  0  0  0  0  0  0  0
    2.5010    0.5390    0.0000 O   0  0  0  0  0  0  0  0  0  0  0  0
    1.7029    0.3299    0.0000 C   0  0  0  0  0  0  0  0  0  0  0  0
    0.5253   -0.3890    0.0000 O   0  0  0  0  0  0  0  0  0  0  0  0
    0.9884    0.7424    0.0000 C   0  0  0  0  0  0  0  0  0  0  0  0
    0.9884    1.5674    0.0000 O   0  0  0  0  0  0  0  0  0  0  0  0
    3.7104    0.0380    0.0000 O   0  0  0  0  0  0  0  0  0  0  0  0
    4.5072    0.2515    0.0000 *   0  0  0  0  0  0  0  0  0  0  0  0
    0.1128    0.3254    0.0000 *   0  0  0  0  0  0  0  0  0  0  0  0
    2.2711   -1.6557    0.0000 N   0  0  0  0  0  0  0  0  0  0  0  0
    1.5567   -1.2432    0.0000 C   0  0  0  0  0  0  0  0  0  0  0  0
    1.5567   -0.4182    0.0000 O   0  0  0  0  0  0  0  0  0  0  0  0
    0.8422   -1.6557    0.0000 C   0  0  0  0  0  0  0  0  0  0  0  0
  4  5  1  0      
  5  6  1  0      
  6  1  1  0      
  4  3  1  1      
  3  2  1  1      
  1  2  1  1      
  2  7  1  0      
  6  8  1  0      
  8  9  1  0      
  3 10  1  0      
  4 11  1  0      
 11 12  1  0      
  1 13  1  0      
 17 18  1  0      
 18 19  1  0      
 19 14  1  0      
 17 16  1  1      
 16 15  1  1      
 14 15  1  1      
 15 20  1  0      
 19 21  1  0      
 21 22  1  0      
 17 23  1  0      
 23 24  1  0      
 14 25  1  0      
 16 26  1  0      
 26 27  1  0      
 27 28  2  0      
 27 29  1  0      
M  STY  1   1 SUP
M  SLB  1   1   1
M  SAL   1  4  26  27  28  29
M  SBL   1  1  26
M  SMT   1 NHCOCH3
M  SBV   1 26   -7.3567    4.5320
M  STY  1   2 SRU
M  SLB  1   2   2
M  SCN  1   2 HT 
M  SAL   2 11   4   5   6   1   2   3  11   7   8   9  10
M  SBL   2  2  12  13
M  SMT   2 n
M  SDI   2  4   -0.5112    0.6456   -0.5112   -0.1794
M  SDI   2  4   -4.1088    0.1080   -4.1088    0.9330
M  STY  1   3 SRU
M  SLB  1   3   3
M  SCN  1   3 HT 
M  SAL   3 11  26  14  15  16  17  18  19  20  21  22  23
M  SBL   3  2  24  25
M  SMT   3 m
M  SDI   3  4    4.1088    0.5573    4.1088   -0.2677
M  SDI   3  4    0.5112    0.0197    0.5112    0.8447
M  END
