# Supplementary material for: Marine Compounds with Therapeutic Potential in Gram-Negative Sepsis
Source: MDPI journal article supplement (doi:10.3390/md11062216), 2013-06-19
Supplement: s14 [file s14]

marinedrugs-11-02216-s008.mol
  ChemDraw02071408492D

 27 29  0  0  0  0  0  0  0  0999 V2000
   -2.6248   -0.1535    0.0000 C   0  0  0  0  0  0  0  0  0  0  0  0
   -2.2123   -0.8680    0.0000 C   0  0  0  0  0  0  0  0  0  0  0  0
   -1.4142   -0.6589    0.0000 C   0  0  0  0  0  0  0  0  0  0  0  0
   -0.6210   -0.8680    0.0000 C   0  0  0  0  0  0  0  0  0  0  0  0
   -1.0334   -0.1535    0.0000 O   0  0  0  0  0  0  0  0  0  0  0  0
   -1.8316   -0.3625    0.0000 C   0  0  0  0  0  0  0  0  0  0  0  0
    1.5002   -0.2591    0.0000 C   0  0  0  0  0  0  0  0  0  0  0  0
    1.0877   -0.9736    0.0000 C   0  0  0  0  0  0  0  0  0  0  0  0
    1.8810   -0.7469    0.0000 C   0  0  0  0  0  0  0  0  0  0  0  0
    2.6790   -0.9736    0.0000 C   0  0  0  0  0  0  0  0  0  0  0  0
    3.0916   -0.2591    0.0000 C   0  0  0  0  0  0  0  0  0  0  0  0
    2.2983   -0.4857    0.0000 O   0  0  0  0  0  0  0  0  0  0  0  0
    0.2426   -0.3816    0.0000 O   0  0  0  0  0  0  0  0  0  0  0  0
   -2.2441    0.3520    0.0000 C   0  0  0  0  0  0  0  0  0  0  0  0
   -1.4472    0.5655    0.0000 O   0  0  0  0  0  0  0  0  0  0  0  0
   -0.8308   -1.2422    0.0000 O   0  0  0  0  0  0  0  0  0  0  0  0
    1.5002    0.5659    0.0000 C   0  0  0  0  0  0  0  0  0  0  0  0
    1.8810    0.0781    0.0000 O   0  0  0  0  0  0  0  0  0  0  0  0
    3.8061   -0.6716    0.0000 *   0  0  0  0  0  0  0  0  0  0  0  0
    2.6790   -1.7986    0.0000 O   0  0  0  0  0  0  0  0  0  0  0  0
   -3.0092   -0.6544    0.0000 O   0  0  0  0  0  0  0  0  0  0  0  0
   -3.8061   -0.8680    0.0000 *   0  0  0  0  0  0  0  0  0  0  0  0
   -2.6256    0.6716    0.0000 O   0  0  0  0  0  0  0  0  0  0  0  0
   -1.9112    1.0841    0.0000 S   0  0  0  0  0  0  0  0  0  0  0  0
   -2.3237    1.7986    0.0000 O   0  0  0  0  0  0  0  0  0  0  0  0
   -1.4987    0.3696    0.0000 O   0  0  0  0  0  0  0  0  0  0  0  0
   -1.1967    1.4966    0.0000 O   0  0  0  0  0  0  0  0  0  0  0  0
  4  5  1  0      
  5  6  1  0      
  6  1  1  0      
  7  8  1  0      
 11 12  1  0      
 12  7  1  0      
  4 13  1  0      
  8 13  1  0      
  8  9  1  1      
 10  9  1  1      
 11 10  1  1      
  4  3  1  1      
  3  2  1  1      
  1  2  1  1      
  6 14  1  0      
 14 15  1  0      
  3 16  1  0      
  7 17  1  0      
  9 18  1  0      
 17 18  1  0      
 11 19  1  0      
 10 20  1  0      
  2 21  1  0      
 21 22  1  0      
  1 23  1  0      
 23 24  1  0      
 24 25  2  0      
 24 26  2  0      
 24 27  1  0      
M  STY  1   1 SUP
M  SLB  1   1   1
M  SAL   1  5  23  24  25  26  27
M  SBL   1  1  25
M  SMT   1 OSO3H
M  SBV   1 25   -4.8526    3.8672
M  STY  1   2 SRU
M  SLB  1   2   2
M  SCN  1   2 HT 
M  SAL   2 15   1   2   3   4   5   6   7   8   9  10  11  12  13  23  14
M  SAL   2  6  15  16  17  18  20  21
M  SBL   2  2  24  21
M  SMT   2 n
M  SDI   2  4   -3.4076   -1.1737   -3.4076   -0.3487
M  SDI   2  4    3.4488   -0.0529    3.4488   -0.8779
M  END
